# Supplementary material
Source: MDPI journal article supplement (https://www.mdpi.com/2304-6740/6/1/28)
Supplement: s1 [file s1]

## Supplementary Material

### Probing the effect of six membered N-heterocyclic carbene - 6-Mes - on the synthesis, structure and reactivity of $\text{Me}_2\text{MOR}(\text{NHC})$ ( $\text{M} = \text{Ga}, \text{In}$ ) complexes.

Martyna Cybularczyk-Cecotka,<sup>1,2</sup> Anna Maria Dąbrowska,<sup>1,3</sup> Maciej Dranka,<sup>3</sup> Piotr Guńka<sup>3</sup> and Paweł Horeglad,<sup>3\*</sup>

<sup>1</sup> Centre of New Technologies, University of Warsaw, Banacha 2c, 02-097, Warsaw, Poland.

<sup>2</sup> Faculty of Chemistry, University of Warsaw, Pasteura 1, 02-093, Warsaw, Poland.

<sup>3</sup> Faculty of Chemistry, Warsaw University of Technology, Noakowskiego 3, 00-664, Warsaw, Poland.

- 1) 1D, 2D NMR data for selected indium and gallium complexes (Figures S1 – S39) .....S1-S20
- 2) NMR data of PLA obtained with selected indium and gallium complexes (Figures S39 – S49)....S20-S25
- 3) NMR data of experiments of 1 with 10 eq *rac*-LA (Figures S50 – S54).....S26-S28
- 4) MALDI-TOF data of PLA obtained with 1 (Figures S55 – S56).....S26
- 5) Weak interactions within crystal structures of 3 and 4 (Figures S57 – S58).....S27

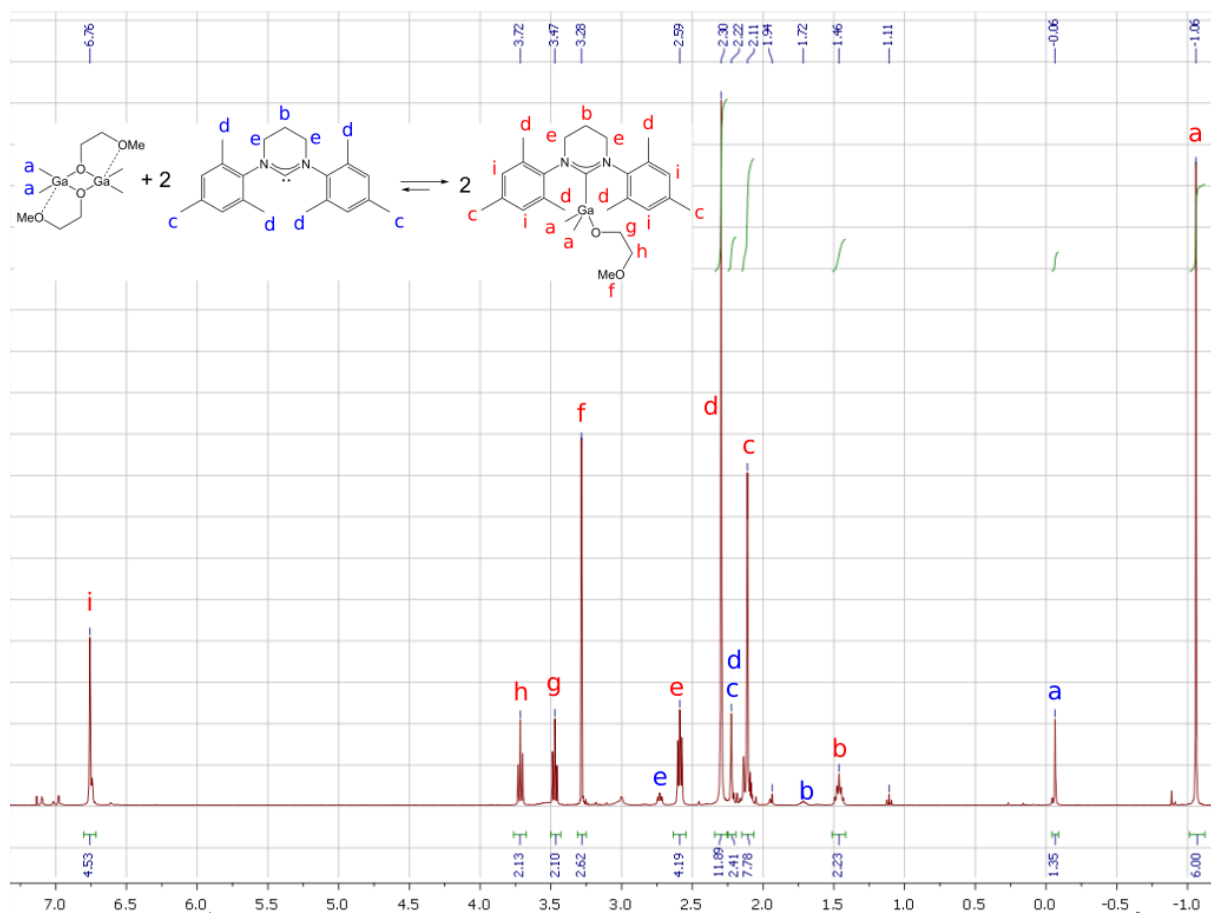

**Figure S 1.** <sup>1</sup>H NMR spectrum of the mixture of  $[\text{Me}_2\text{Ga}(\mu\text{-OCH}_2\text{CH}_2\text{OMe})_2]$  and 6-Mes ( $[\text{Ga}]:[6\text{-Mes}] = 1:1$ ) in  $\text{toluene-}d_8$  (400 MHz).

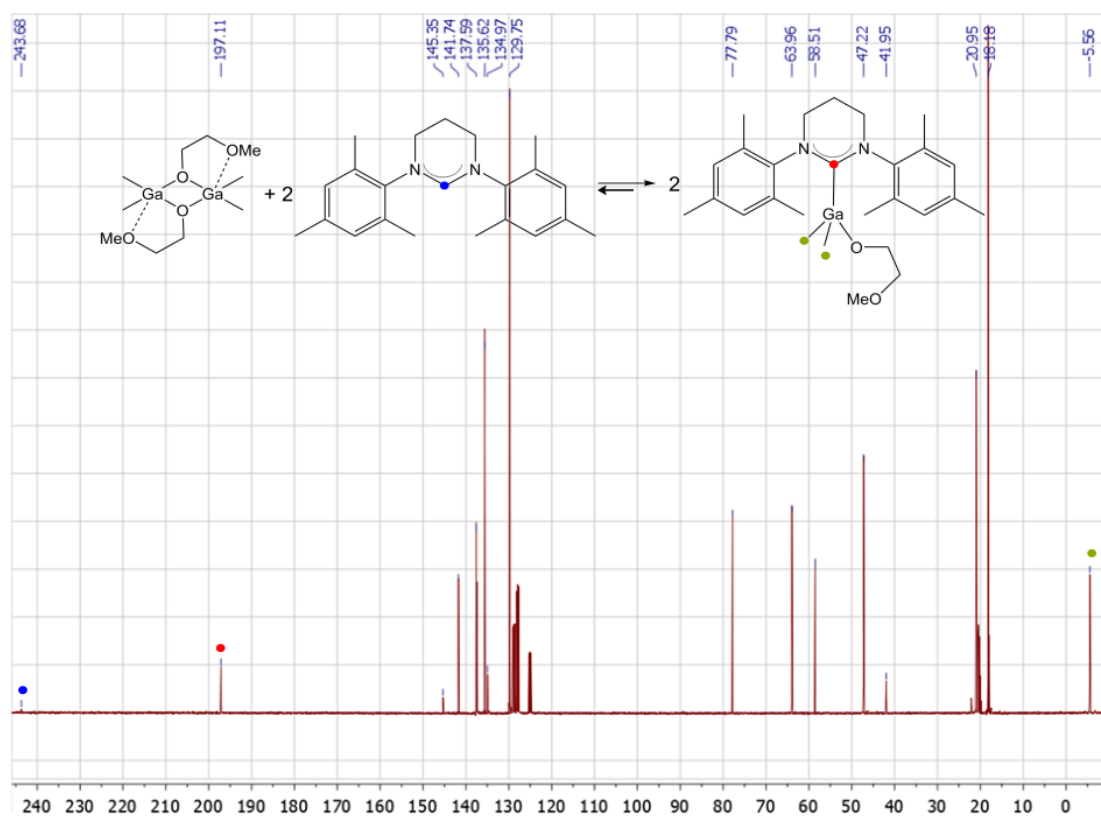

**Figure S 2.**  $^{13}\text{C}$  NMR spectrum of the mixture of  $[\text{Me}_2\text{Ga}(\mu\text{-OCH}_2\text{CH}_2\text{OMe})]_2$  and 6-Mes ( $[\text{Ga}]:[6\text{-Mes}] = 1:1$ ) in toluene- $d_8$  (100 MHz).

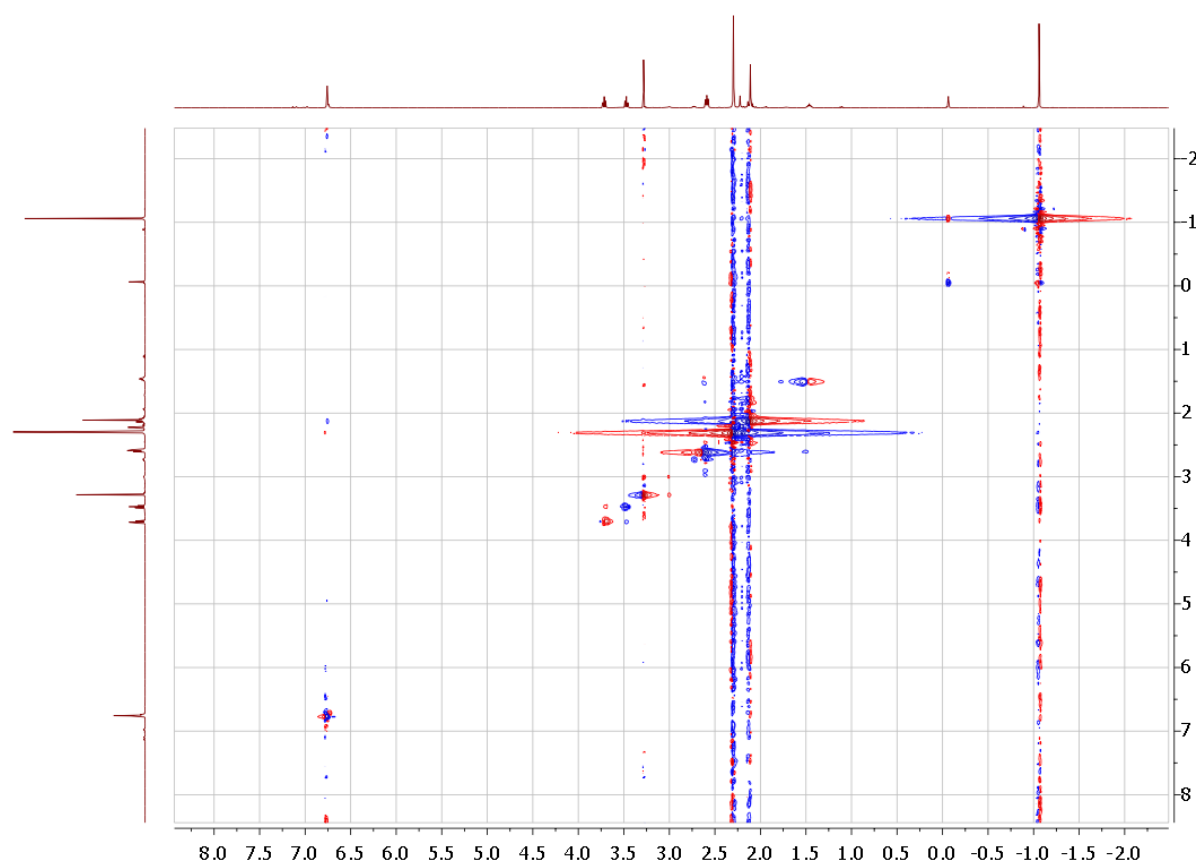

**Figure S 3.** ROESY NMR of  $\text{Me}_2\text{Ga}(\mu\text{-OCH}_2\text{CH}_2\text{OMe})(6\text{-Mes})$  (**1**) in toluene- $d_8$

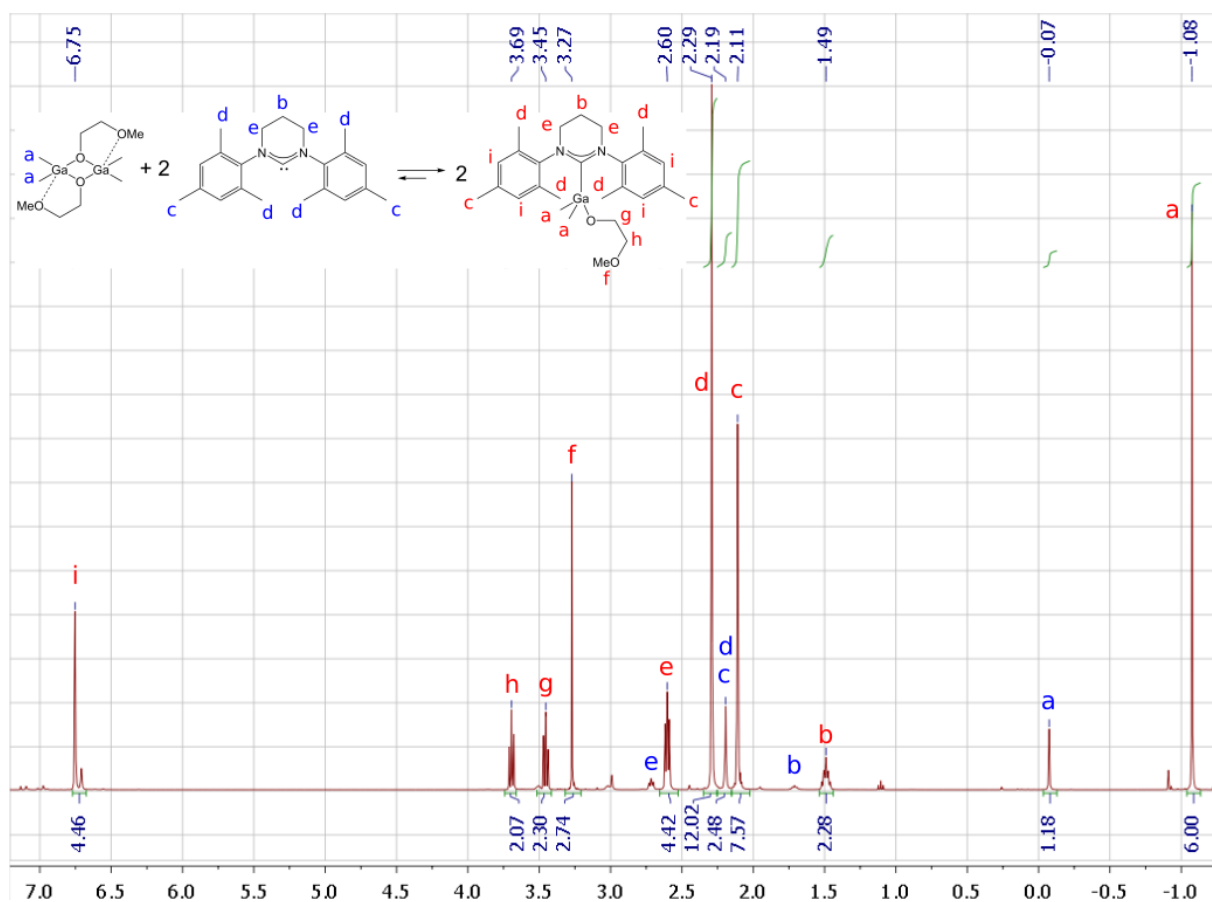

**Figure S 4.**  $^1\text{H}$  NMR spectrum of  $\text{Me}_2\text{Ga}(\text{OCH}_2\text{CH}_2\text{OMe})(6\text{-Mes})$  (**1**) in  $\text{toluene-}d_8$  (400 MHz).

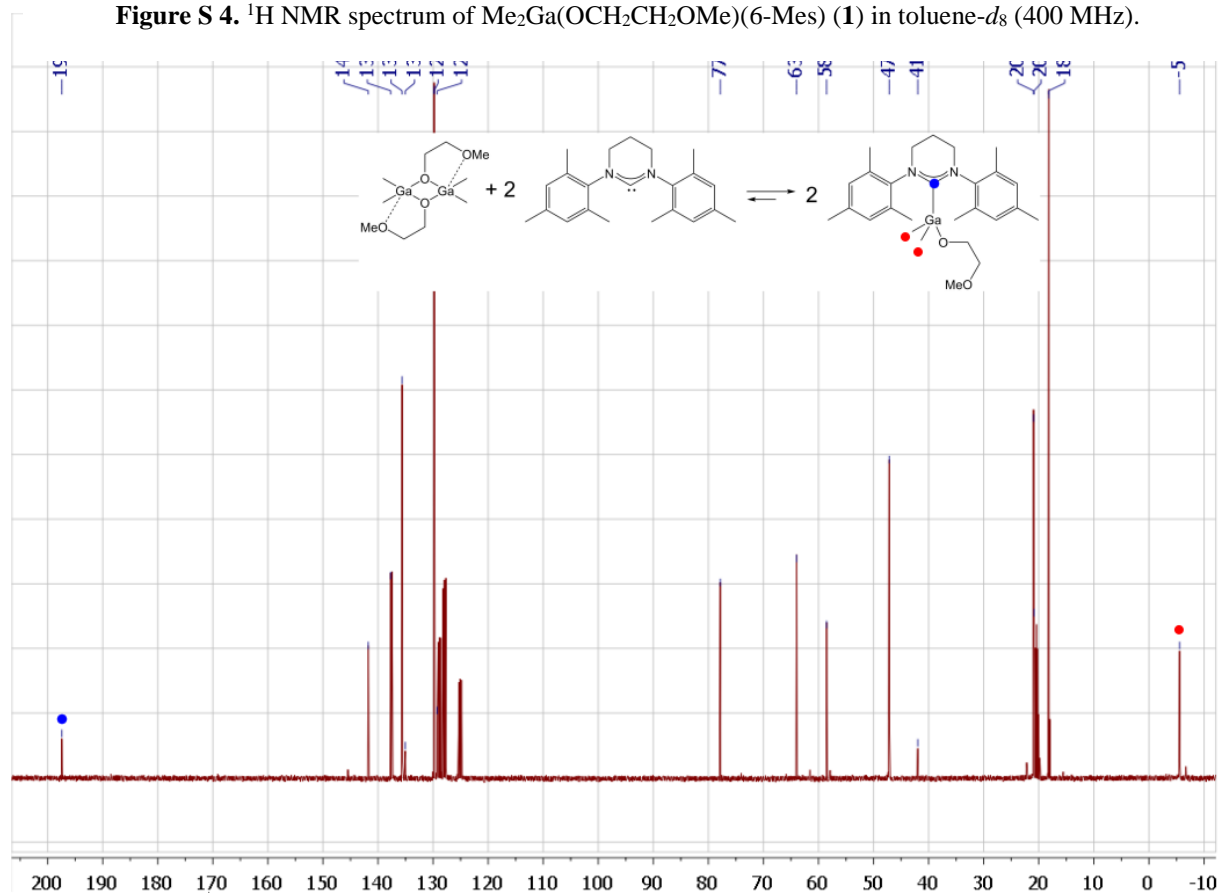

**Figure S 5.**  $^{13}\text{C}$  NMR spectrum of  $\text{Me}_2\text{Ga}(\text{OCH}_2\text{CH}_2\text{OMe})(6\text{-Mes})$  (**1**) in  $\text{toluene-}d_8$  (100 MHz).

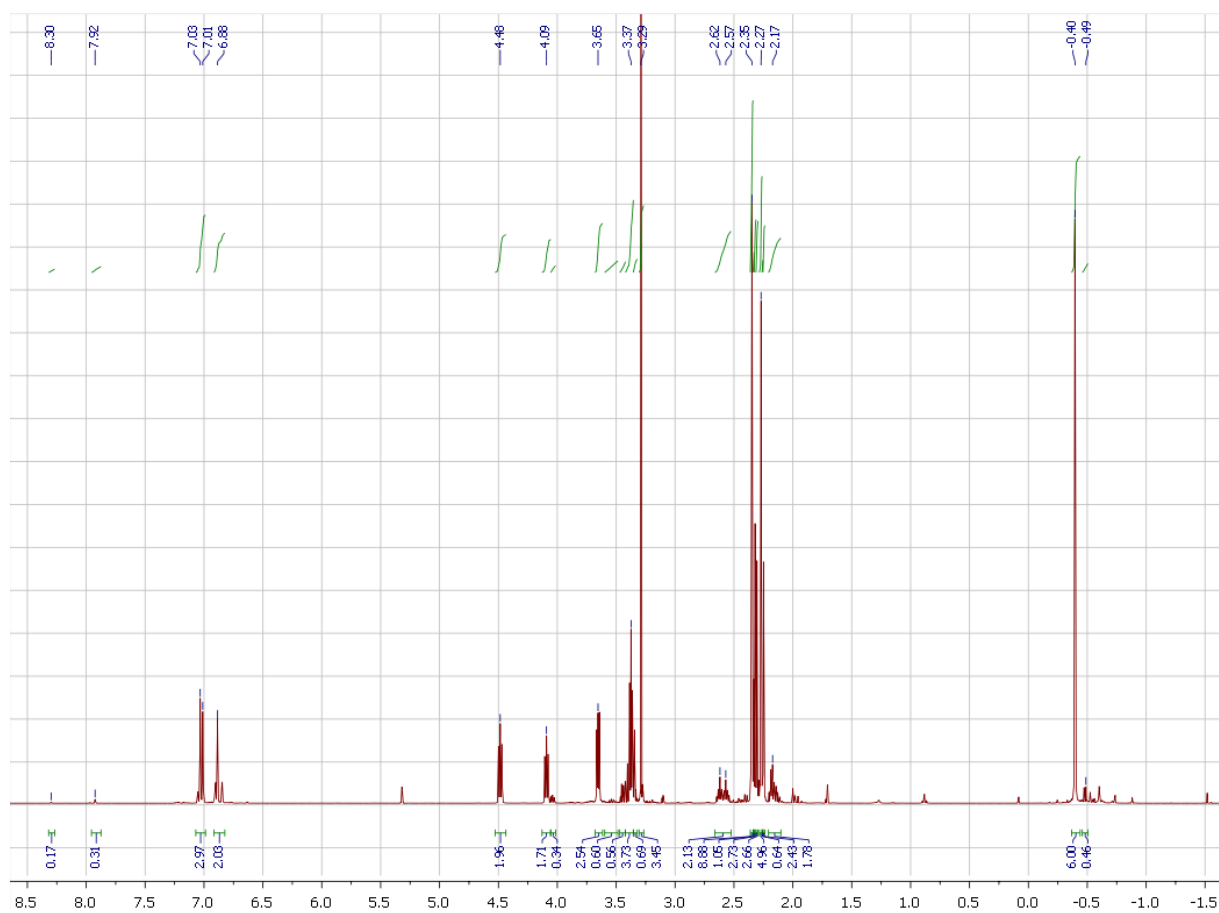

**Figure S 6.** <sup>1</sup>H NMR spectrum measured 20 minutes after dissolution of Me<sub>2</sub>Ga(OCH<sub>2</sub>CH<sub>2</sub>OMe)(6-Mes) (**1**) in

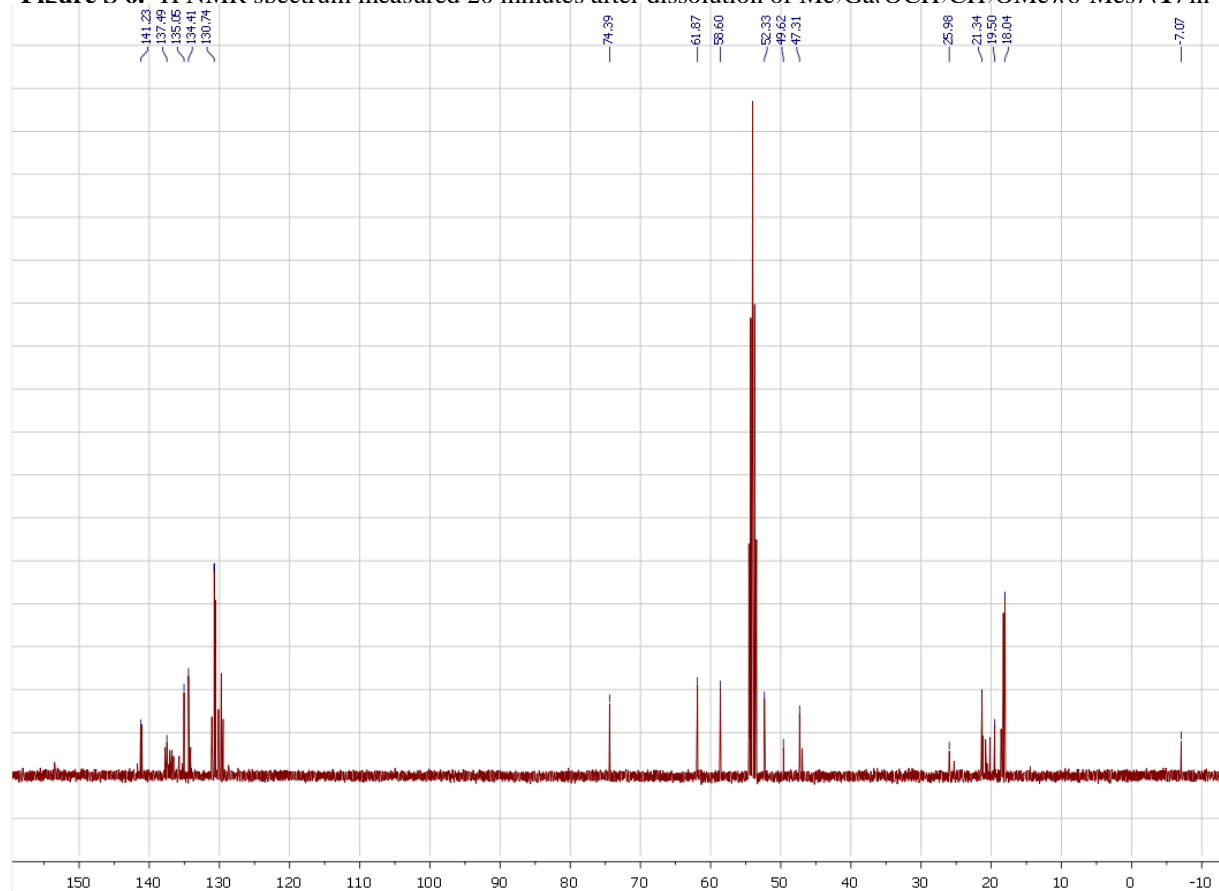

**Figure S 7.** <sup>13</sup>C NMR spectrum measured 20 minutes after dissolution of Me<sub>2</sub>Ga(OCH<sub>2</sub>CH<sub>2</sub>OMe)(6-Mes) (**1**) in CD<sub>2</sub>Cl<sub>2</sub>.

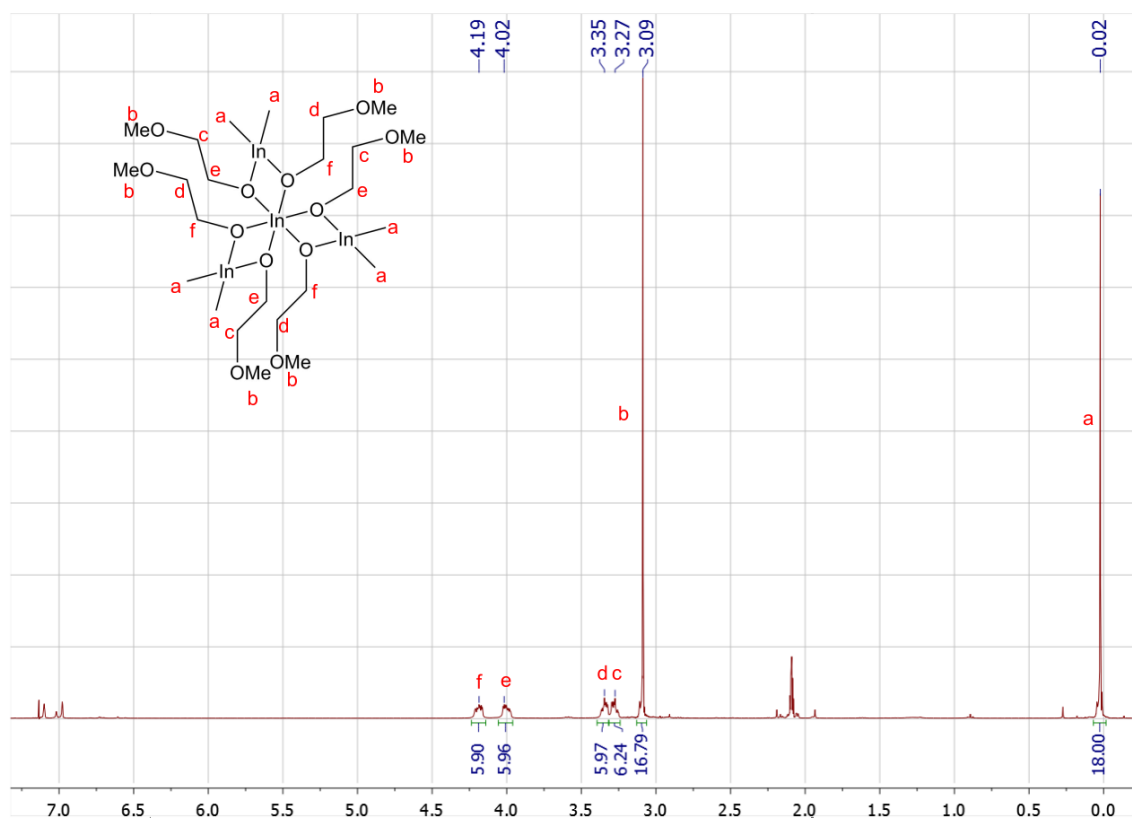

**Figure S 8.**  $^1\text{H}$  NMR spectrum of  $\text{In}\{\text{Me}_2\text{In}(\mu\text{-OCH}_2\text{CH}_2\text{OMe})_2\}_3$  in toluene- $d_8$  (400 MHz).

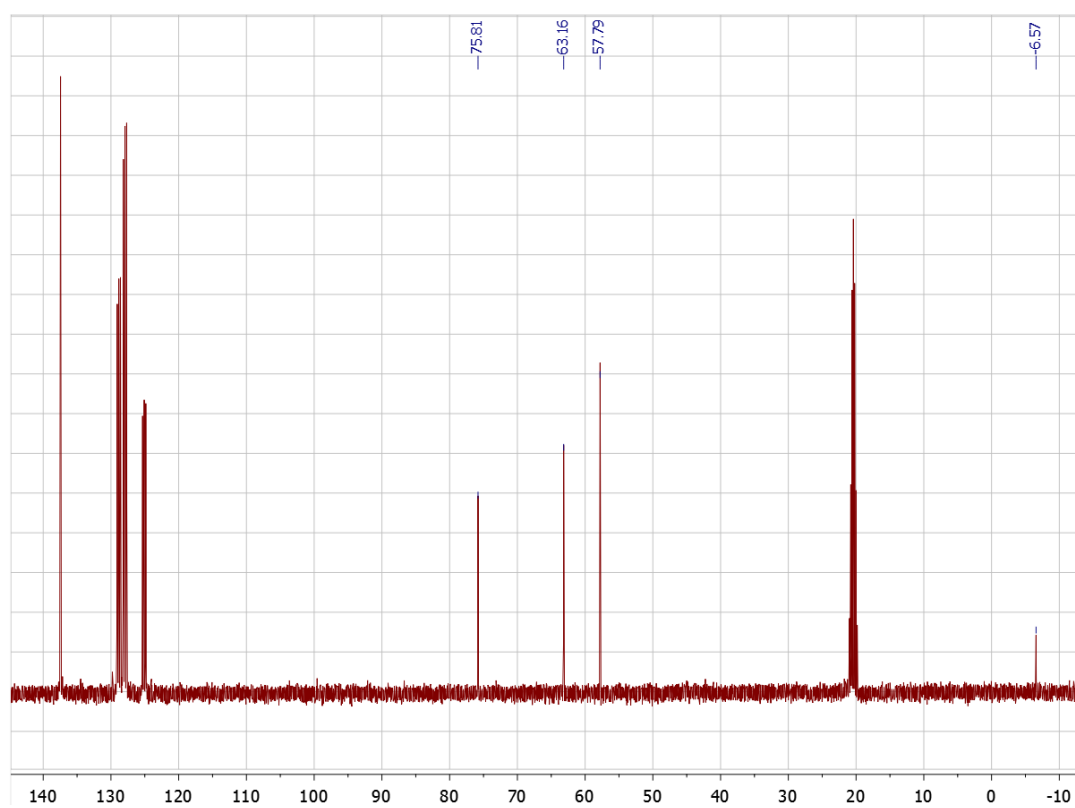

**Figure S 9.**  $^{13}\text{C}$  NMR spectrum of  $\text{In}\{\text{Me}_2\text{In}(\mu\text{-OCH}_2\text{CH}_2\text{OMe})_2\}_3$  in toluene- $d_8$  (100 MHz).

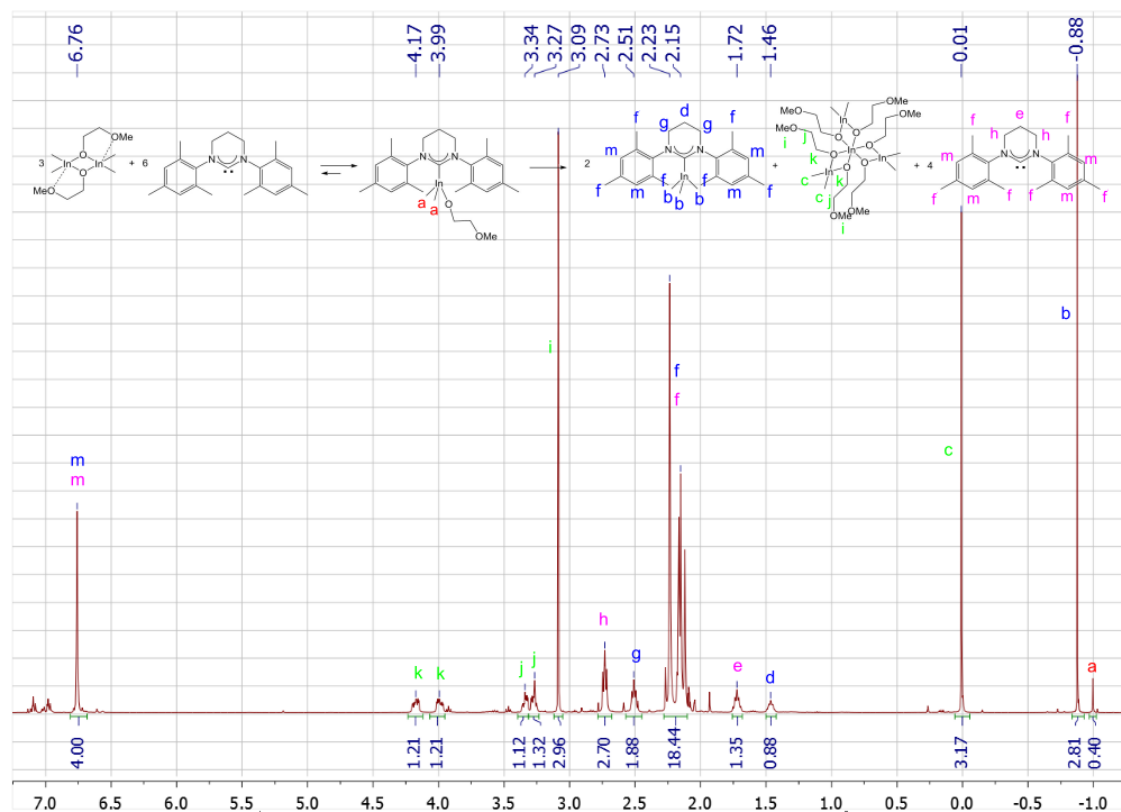

**Figure S 10.**  $^1\text{H}$  NMR spectrum of the mixture of  $[\text{Me}_2\text{In}(\mu\text{-OCH}_2\text{CH}_2\text{OMe})]_2$  and 6-Mes ( $[\text{In}]:[6\text{-Mes}] = 1:1$ ) in toluene- $d_8$  (400 MHz).

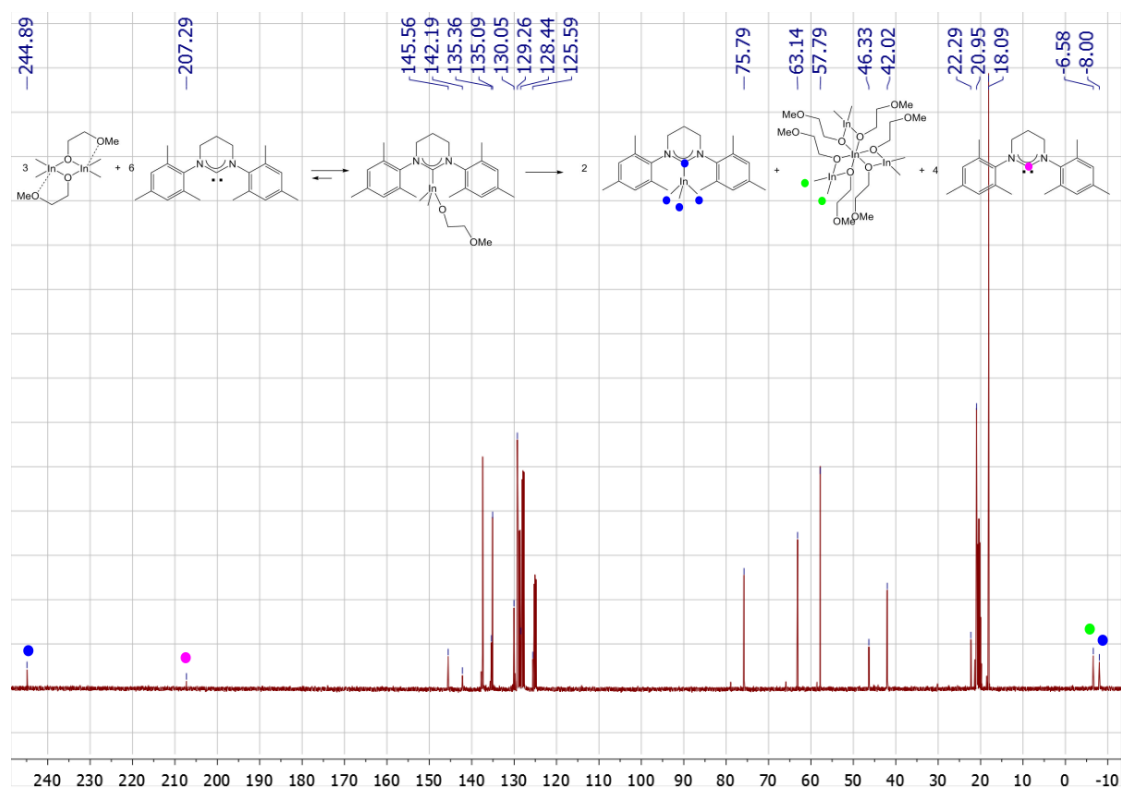

**Figure S 11.**  $^{13}\text{C}$  NMR spectrum of the mixture of  $[\text{Me}_2\text{In}(\mu\text{-OCH}_2\text{CH}_2\text{OMe})]_2$  and 6-Mes ( $[\text{In}]:[6\text{-Mes}] = 1:1$ ) in toluene- $d_8$  (100 MHz).

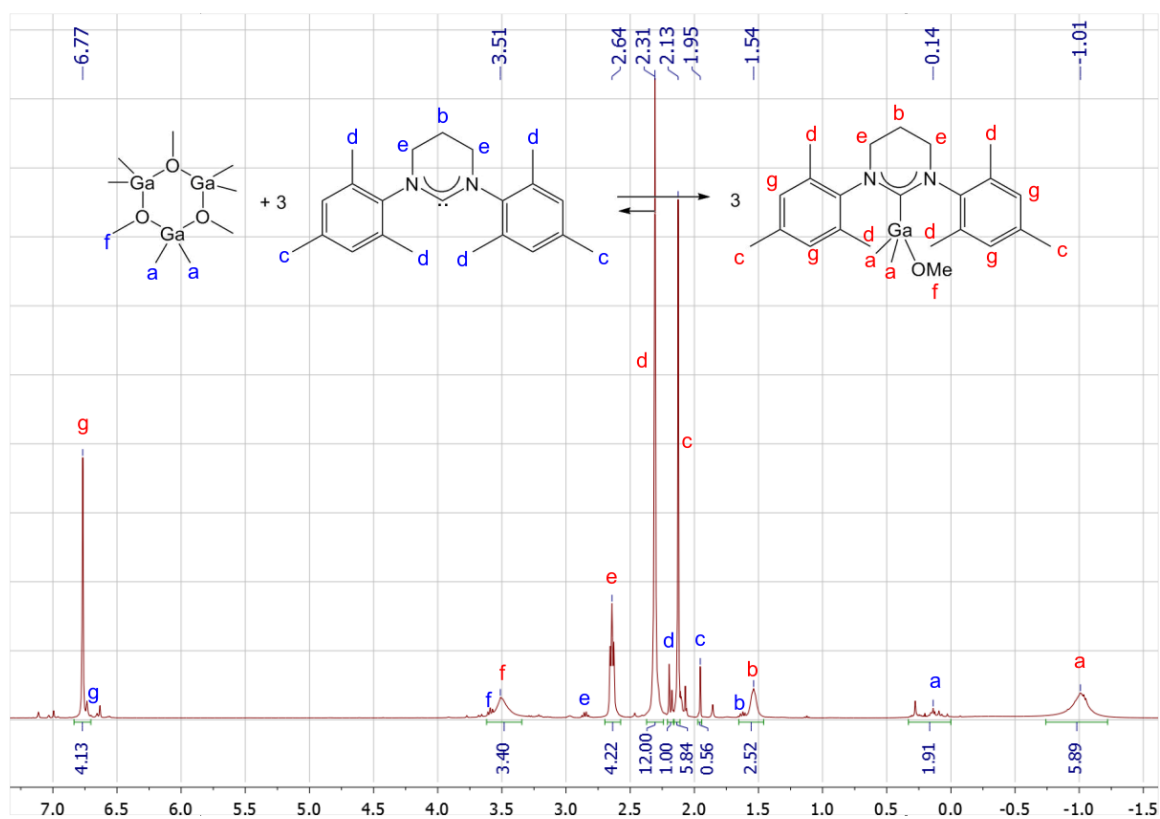

**Figure S 12.**  $^1\text{H}$  NMR spectrum of the mixture of  $[\text{Me}_2\text{Ga}(\mu\text{-OMe})]_3$  and 6-Mes ( $[\text{Ga}]:[6\text{-Mes}] = 1:1$ ) in  $\text{toluene-}d_8$  (400 MHz).

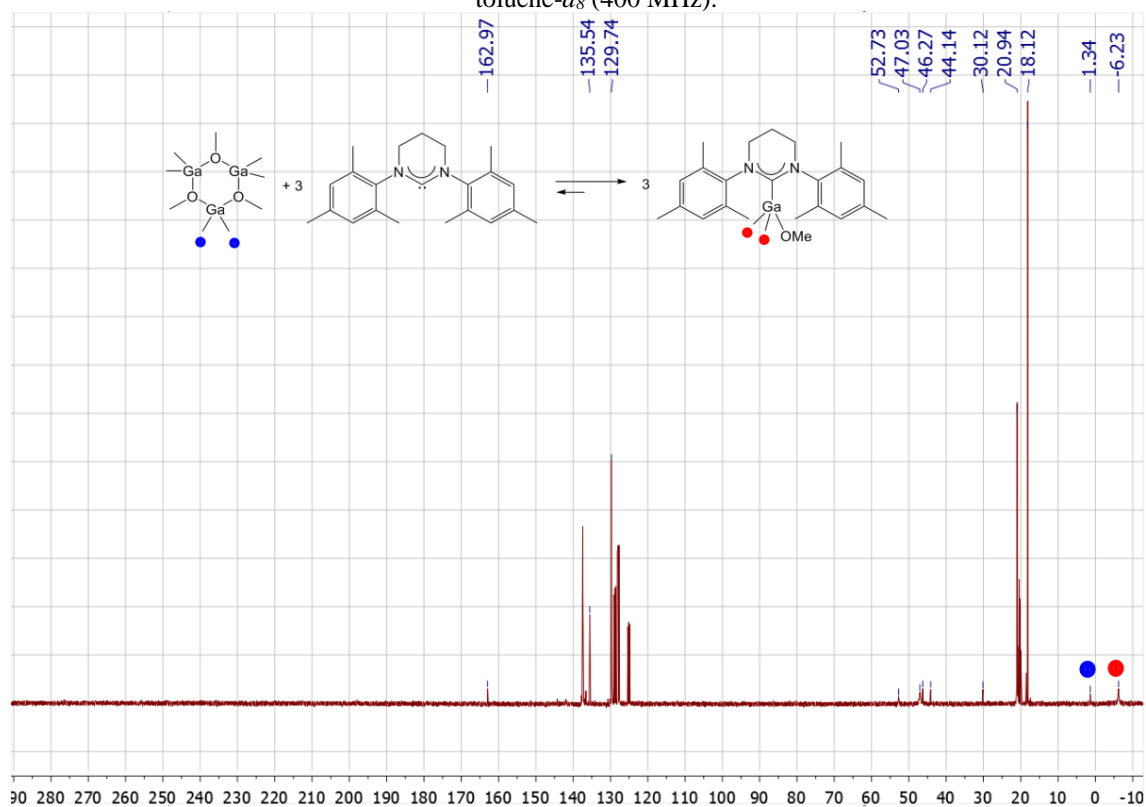

**Figure S 13.**  $^{13}\text{C}$  NMR spectrum of the mixture of  $[\text{Me}_2\text{Ga}(\mu\text{-OMe})]_3$  and 6-Mes ( $[\text{Ga}]:[6\text{-Mes}] = 1:1$ ) in  $\text{toluene-}d_8$  (100 MHz).

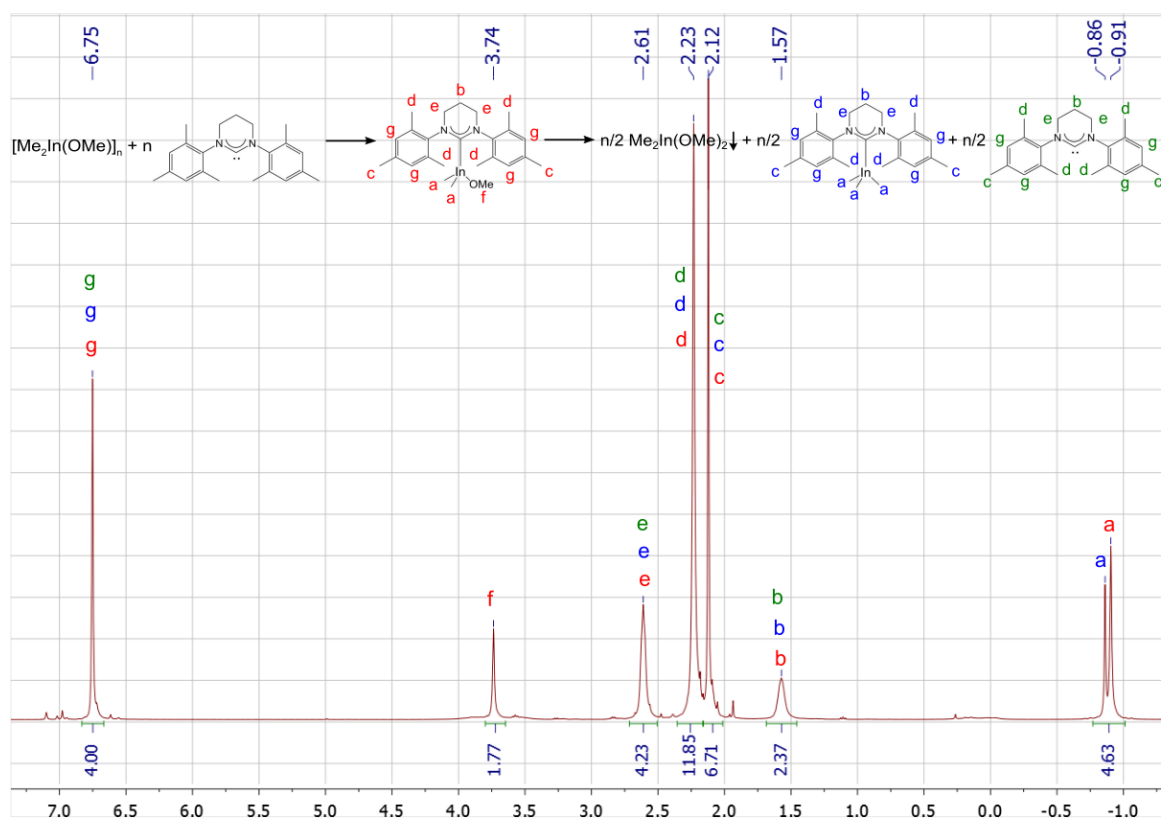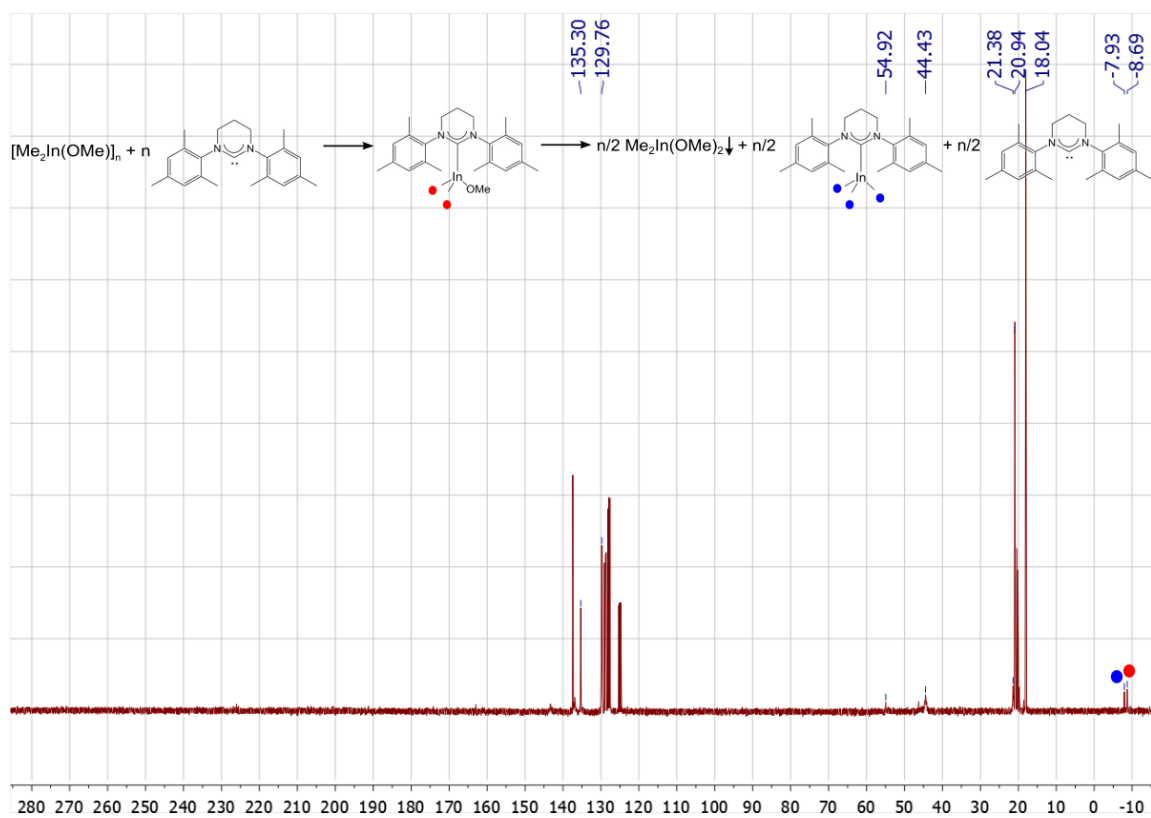



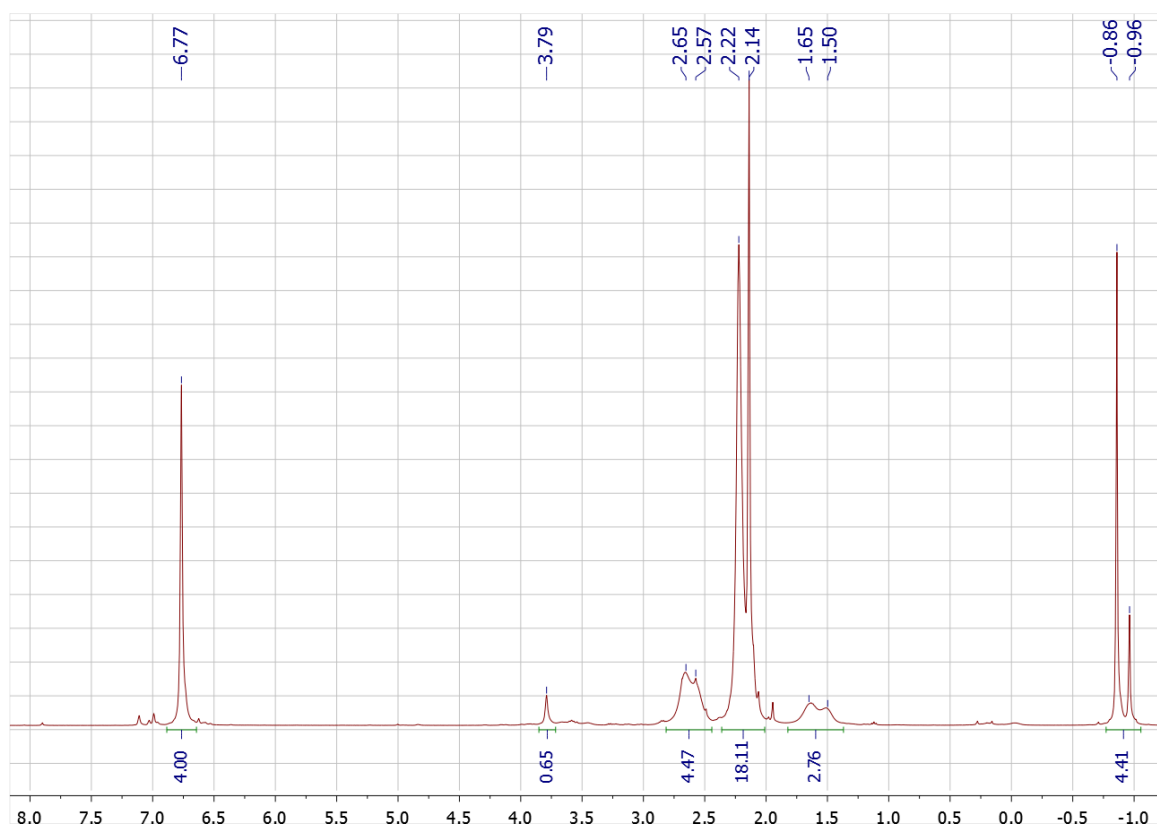

**Figure S 16.**  $^1\text{H}$  NMR spectrum of the mixture of  $[\text{Me}_2\text{In}(\mu\text{-OMe})]_n$  and 6-Mes ( $[\text{In}]:[6\text{-Mes}] = 1:1$ ) in toluene- $d_8$  (400 MHz), 24h after mixing reagents.

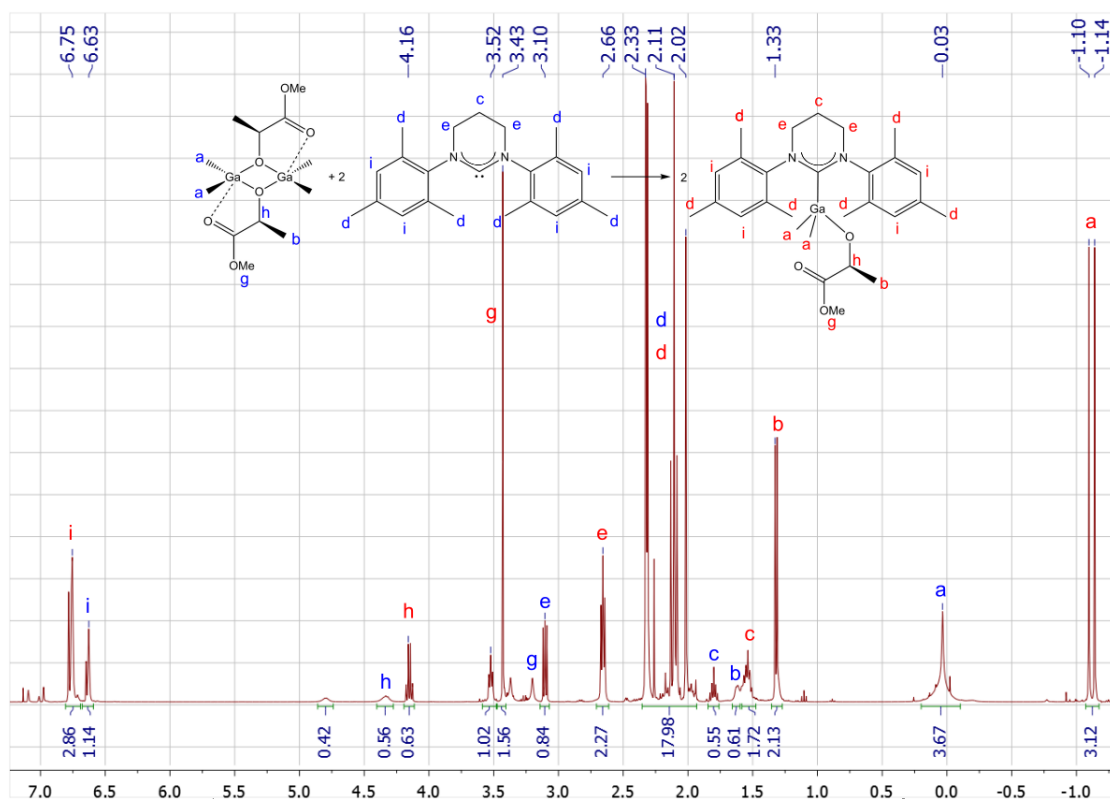

**Figure S 17.**  $^1\text{H}$  NMR spectrum of the mixture of  $(S,S)\text{-}[\text{Me}_2\text{Ga}(\text{OCH}(\text{CH}_3)\text{COOMe})]_2$  and 6-Mes ( $[\text{Ga}]:[6\text{-Mes}] = 1:1$ ) in toluene- $d_8$  (400 MHz).

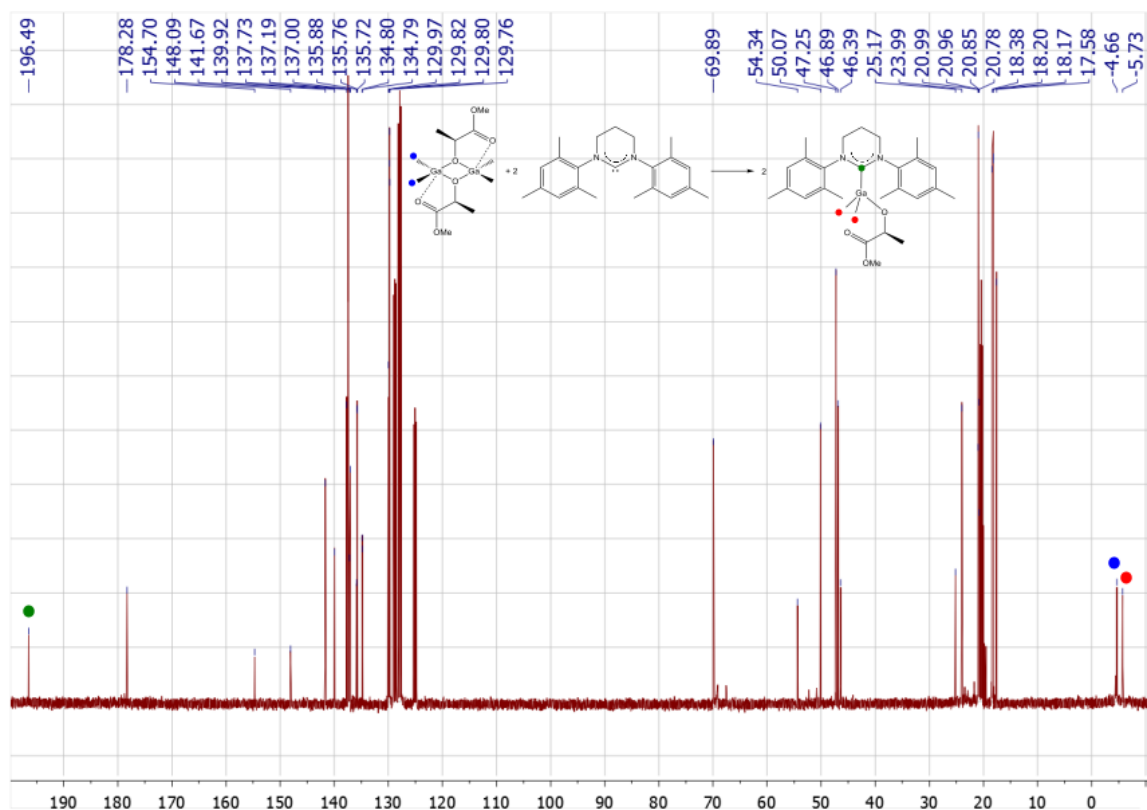

**Figure S 18.** <sup>13</sup>C NMR spectrum of the mixture of (S,S)-[Me<sub>2</sub>Ga(OCH(CH<sub>3</sub>)COOMe)]<sub>2</sub> and 6-Mes ([Ga]:[6-Mes] = 1:1) in toluene-*d*<sub>8</sub> (100 MHz).

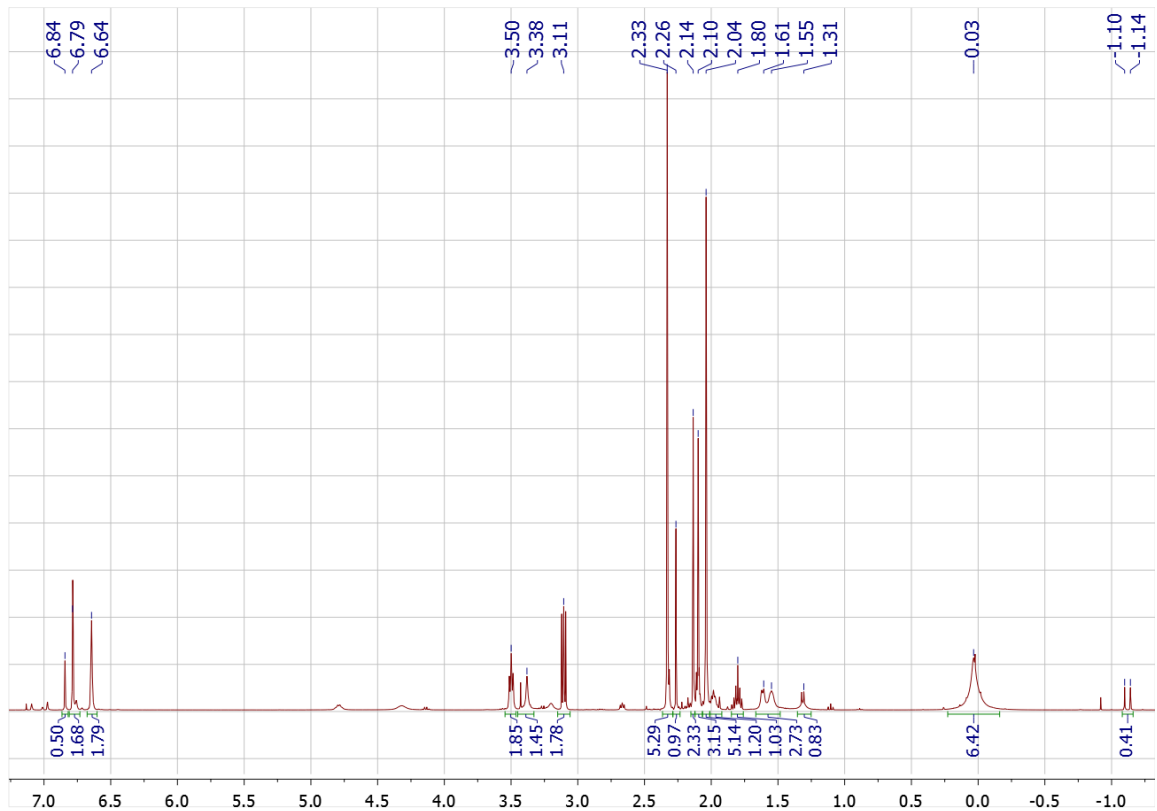

**Figure S 19.** <sup>1</sup>H NMR spectrum of the mixture of (S,S)-[Me<sub>2</sub>Ga(OCH(CH<sub>3</sub>)COOMe)]<sub>2</sub> and 6-Mes ([Ga]:[6-Mes] = 1:1) 24h after mixing in toluene-*d*<sub>8</sub> (400 MHz).

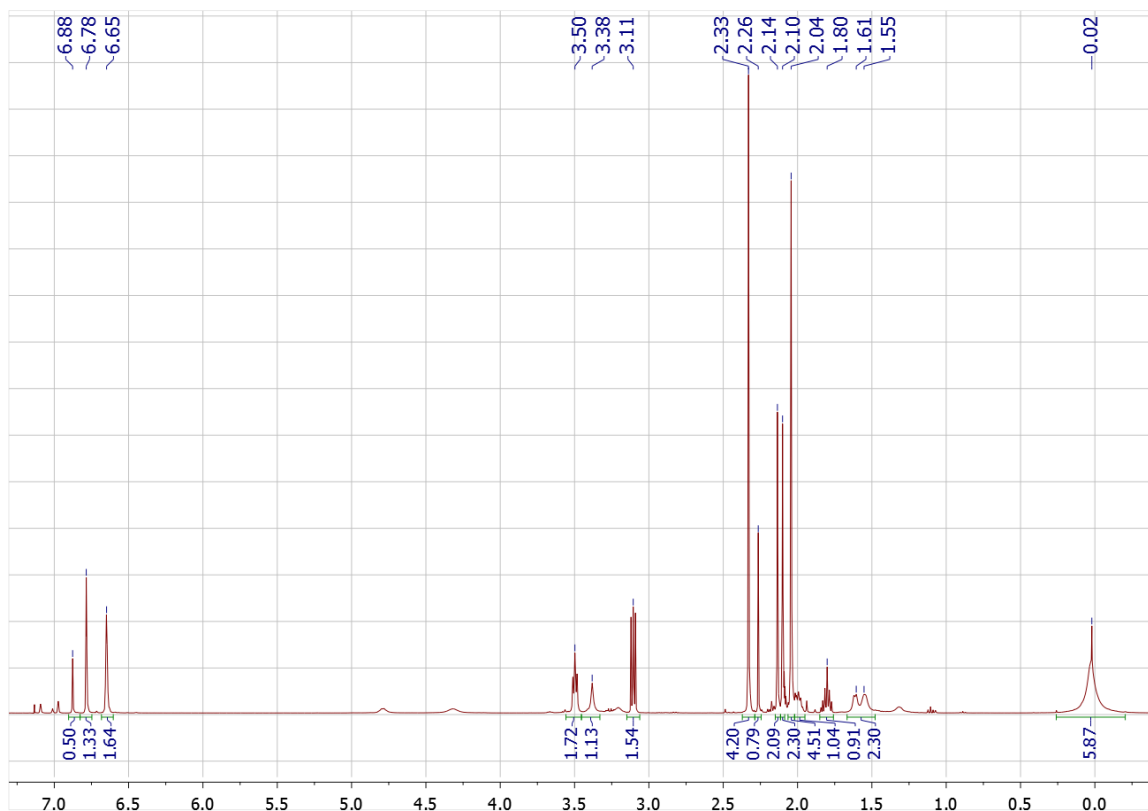

**Figure S 20.**  $^1\text{H}$  NMR spectrum of the mixture of  $(S,S)\text{-}[\text{Me}_2\text{Ga}(\text{OCH}(\text{CH}_3)\text{COOMe})_2]$  and 6-Mes ( $[\text{Ga}]:[6\text{-Mes}] = 1:1$ ) 96h after mixing in toluene- $d_8$  (400 MHz).

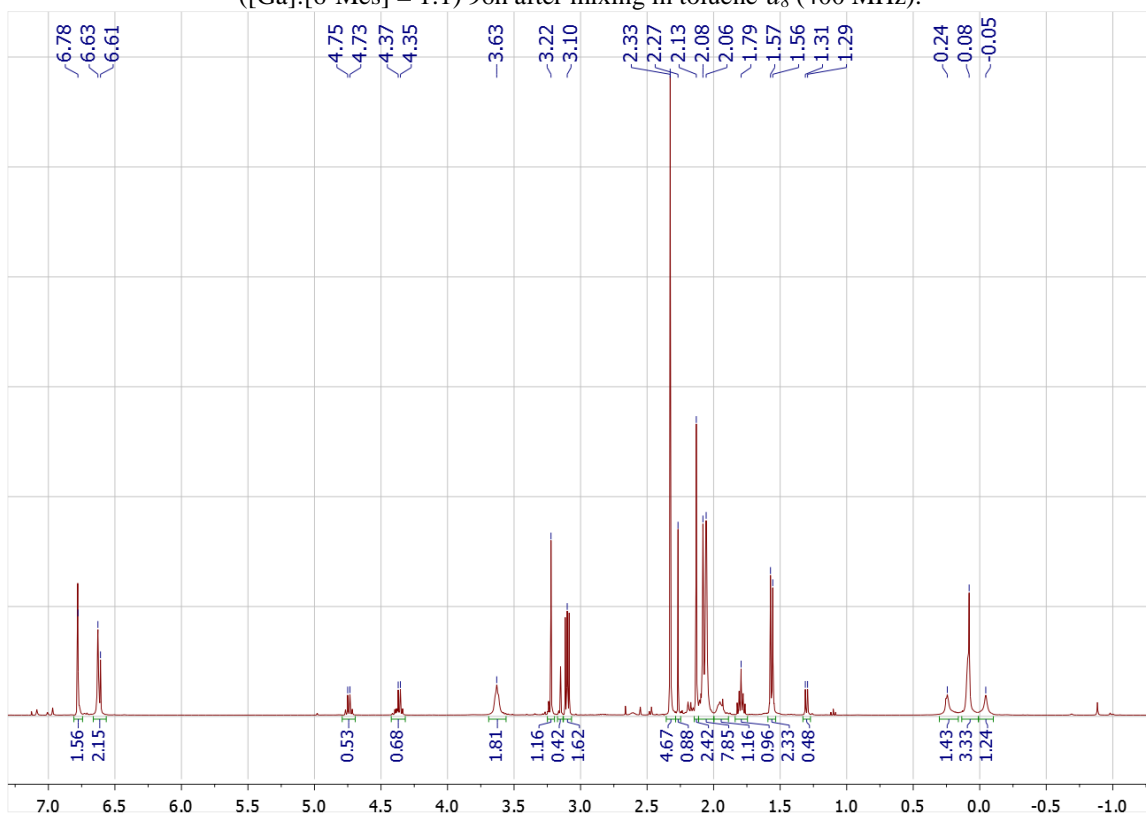

**Figure S21.**  $^1\text{H}$  NMR spectrum of the mixture of  $(S,S)\text{-}[\text{Me}_2\text{In}(\text{OCH}(\text{CH}_3)\text{COOMe})_2]$  and 6-Mes ( $[\text{In}]:[6\text{-Mes}] = 1:1$ ) in toluene- $d_8$  (400 MHz).

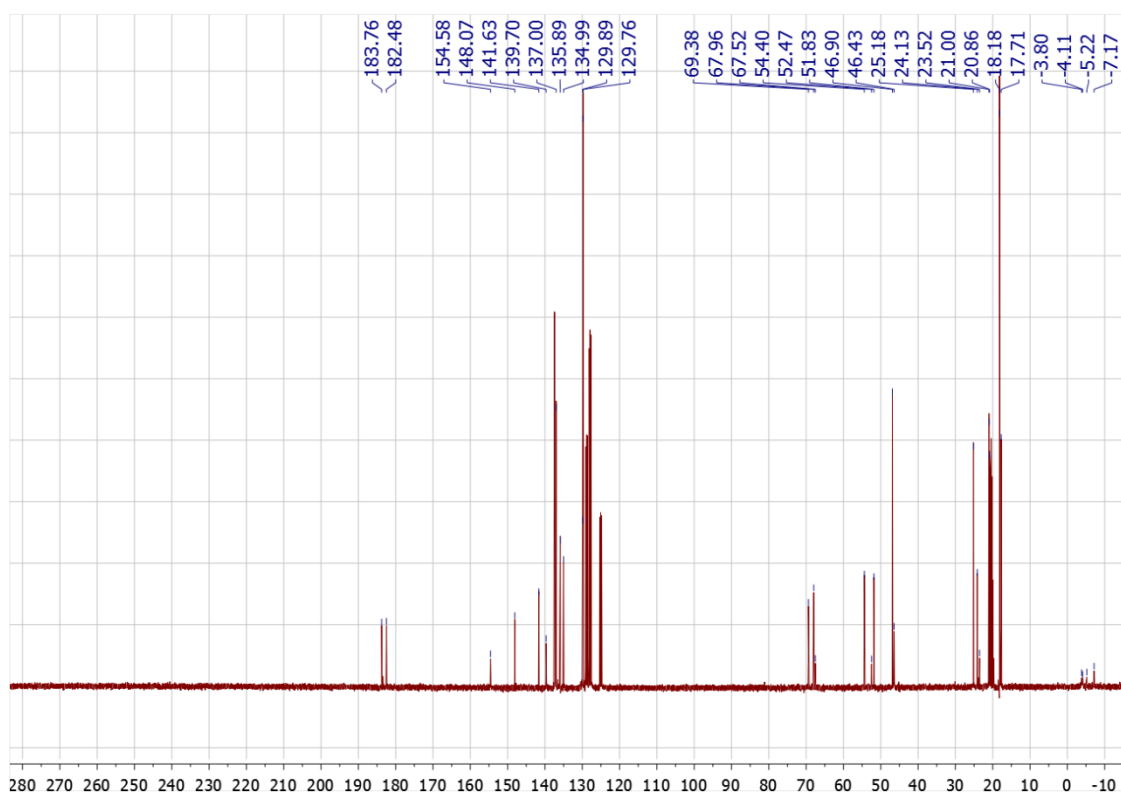

**Figure S 22.**  $^{13}\text{C}$  NMR spectrum of mixture of the mixture of  $(S,S)\text{-}[\text{Me}_2\text{In}(\text{OCH}(\text{CH}_3)\text{COOMe})]_2$  and 6-Mes ( $[\text{In}]:[6\text{-Mes}] = 1:1$ ) in toluene- $d_8$  (100 MHz).

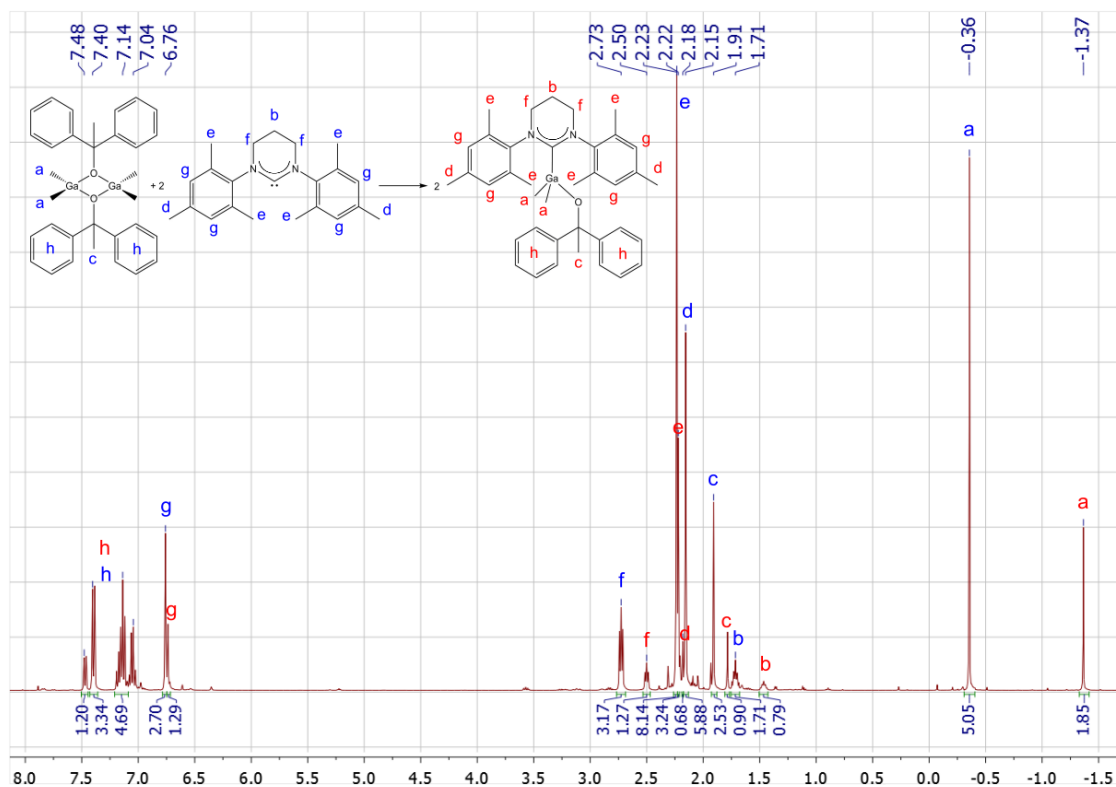

**Figure S 23.**  $^1\text{H}$  NMR spectrum of the mixture of  $(S,S)\text{-}[\text{Me}_2\text{Ga}(\text{OCPh}_2\text{CH}_3)]_2$  and 6-Mes ( $[\text{Ga}]:[6\text{-Mes}] = 1:1$ ) in toluene- $d_8$  (400 MHz).

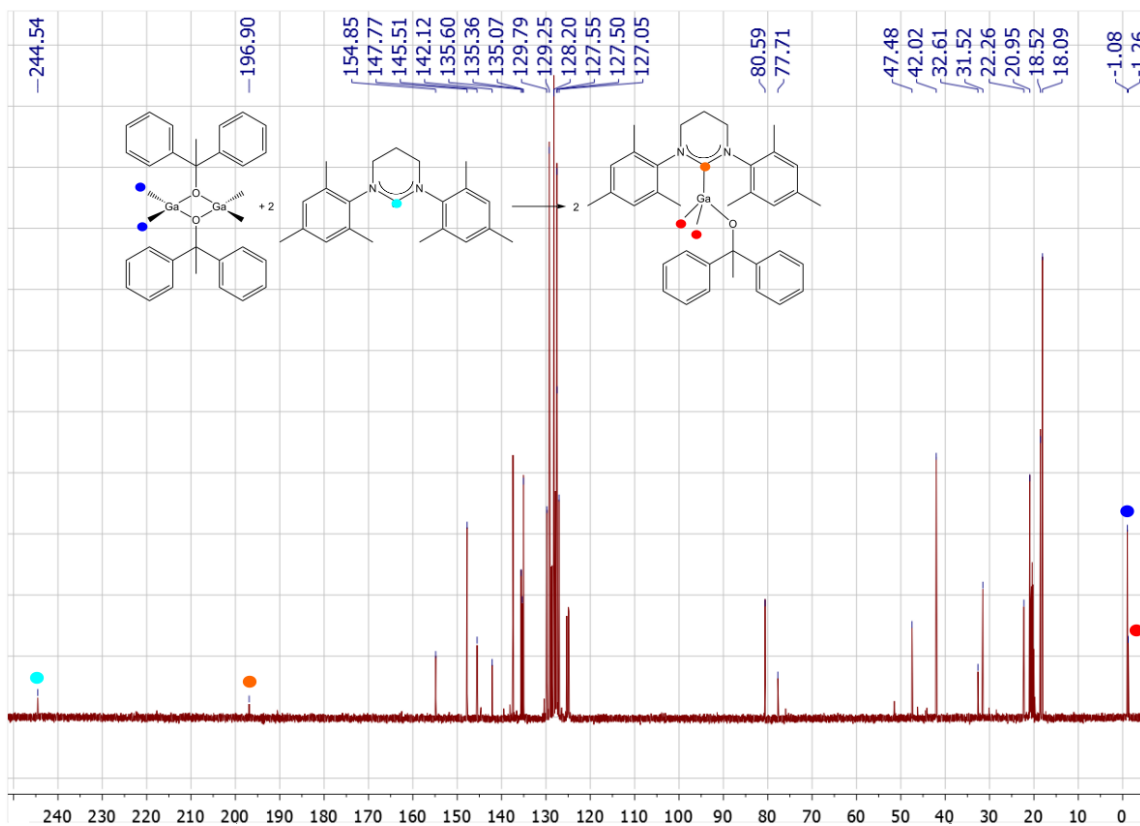

**Figure S 24.** <sup>13</sup>C NMR spectrum of the mixture of (S,S)-[Me<sub>2</sub>Ga(OCPh<sub>2</sub>CH<sub>3</sub>)]<sub>2</sub> and 6-Mes ([Ga]:[6-Mes] = 1:1) in toluene-*d*<sub>8</sub> (100 MHz).

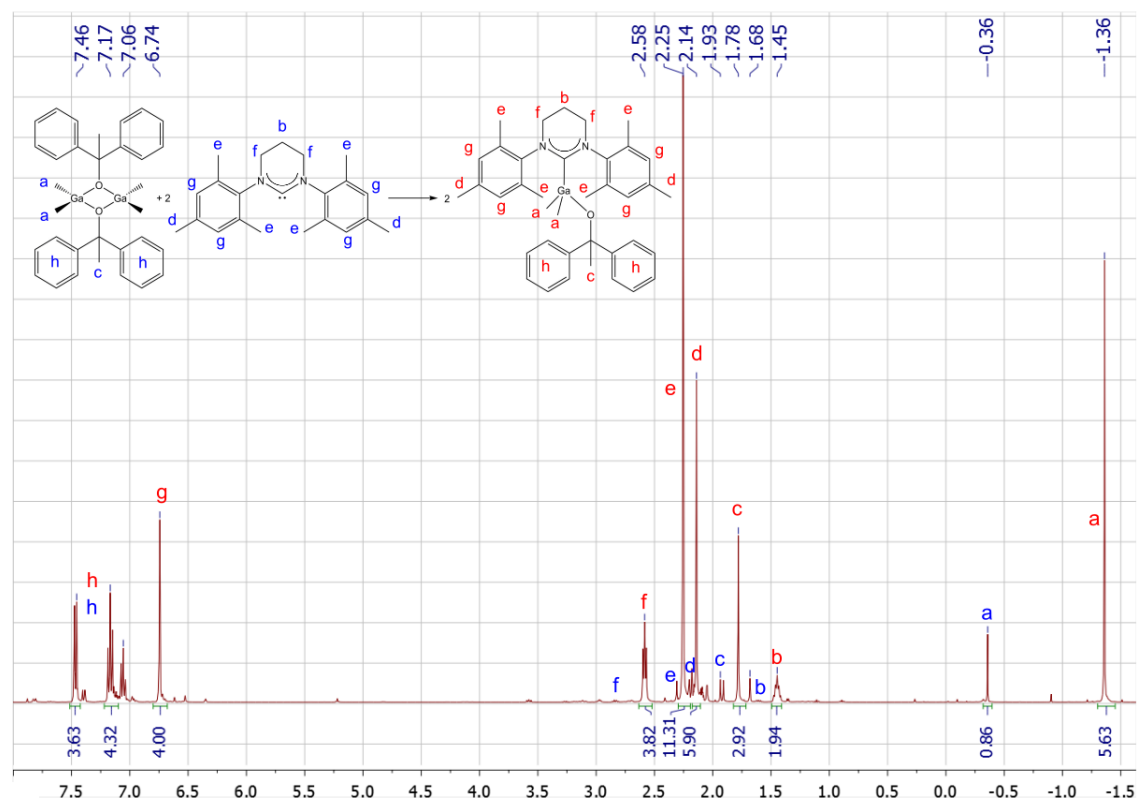

**Figure S 25.** <sup>1</sup>H NMR spectrum of the mixture of (S,S)-[Me<sub>2</sub>Ga(OCPh<sub>2</sub>CH<sub>3</sub>)]<sub>2</sub> and 6-Mes ([Ga]:[6-Mes] = 1:1) 24h after mixing in toluene-*d*<sub>8</sub> (400 MHz).

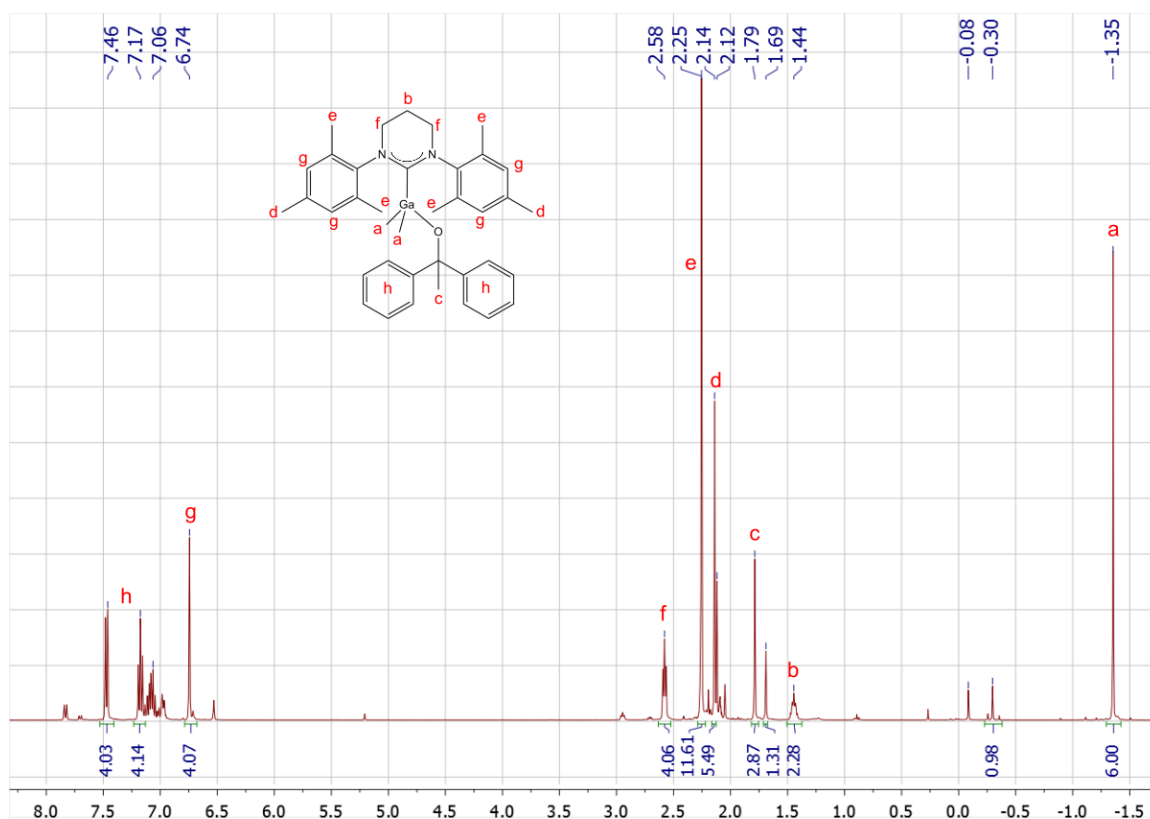

**Figure S 26.** <sup>1</sup>H NMR spectrum of  $\text{Me}_2\text{Ga}(\text{OCPh}_2\text{CH}_3)(6\text{-Mes})$  (**3**) in  $\text{toluene-}d_8$  (400 MHz).

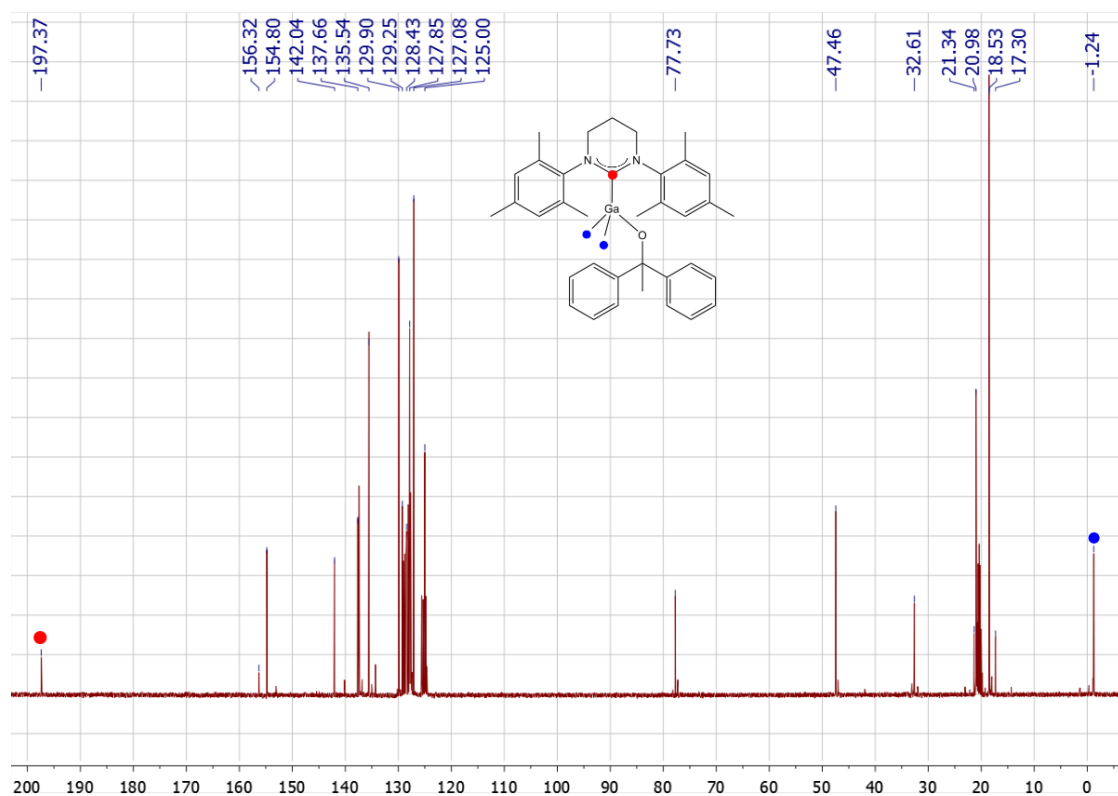

**Figure S 27.** <sup>13</sup>C NMR spectrum of  $\text{Me}_2\text{Ga}(\text{OCPh}_2\text{CH}_3)(6\text{-Mes})$  (**3**) in  $\text{toluene-}d_8$  (100 MHz).

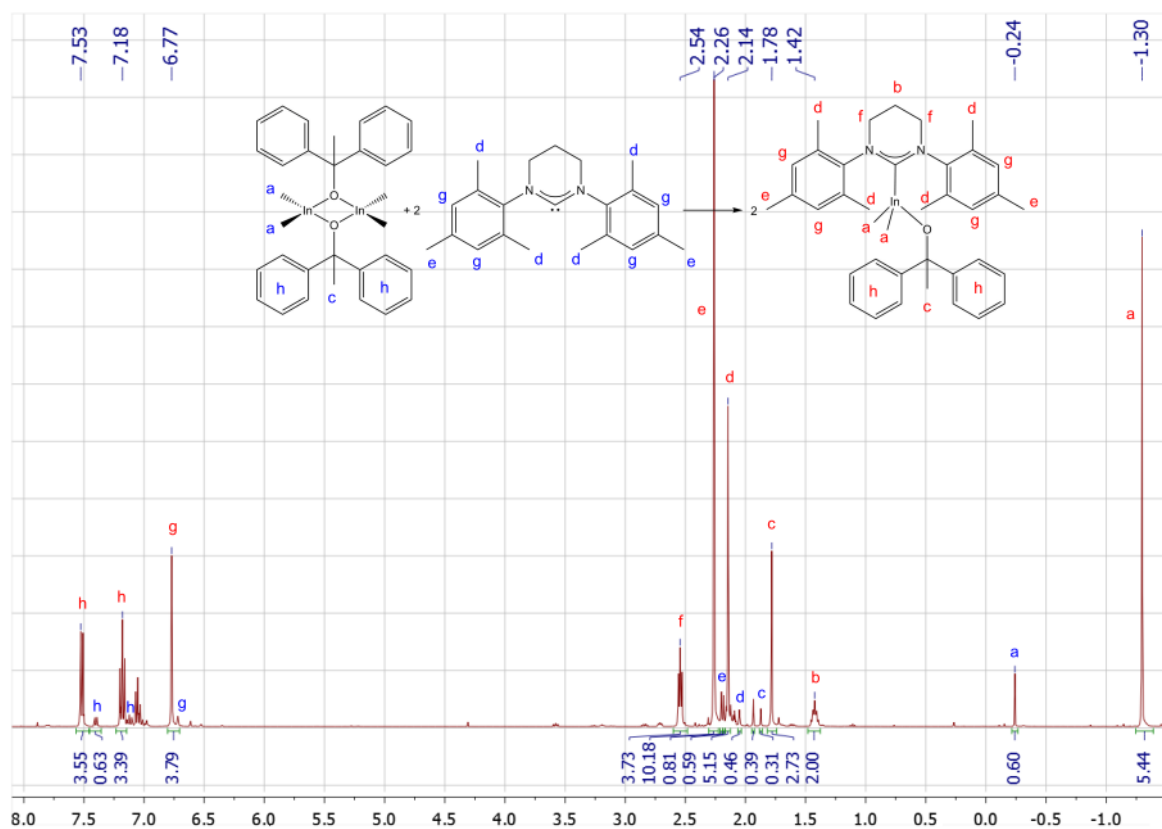

**Figure S 28.** <sup>1</sup>H NMR spectrum of the mixture of (S,S)-[Me<sub>2</sub>In(OCPh<sub>2</sub>CH<sub>3</sub>)<sub>2</sub>] and 6-Mes ([In]:[6-Mes] = 1:1) in toluene-*d*<sub>8</sub> (400 MHz).

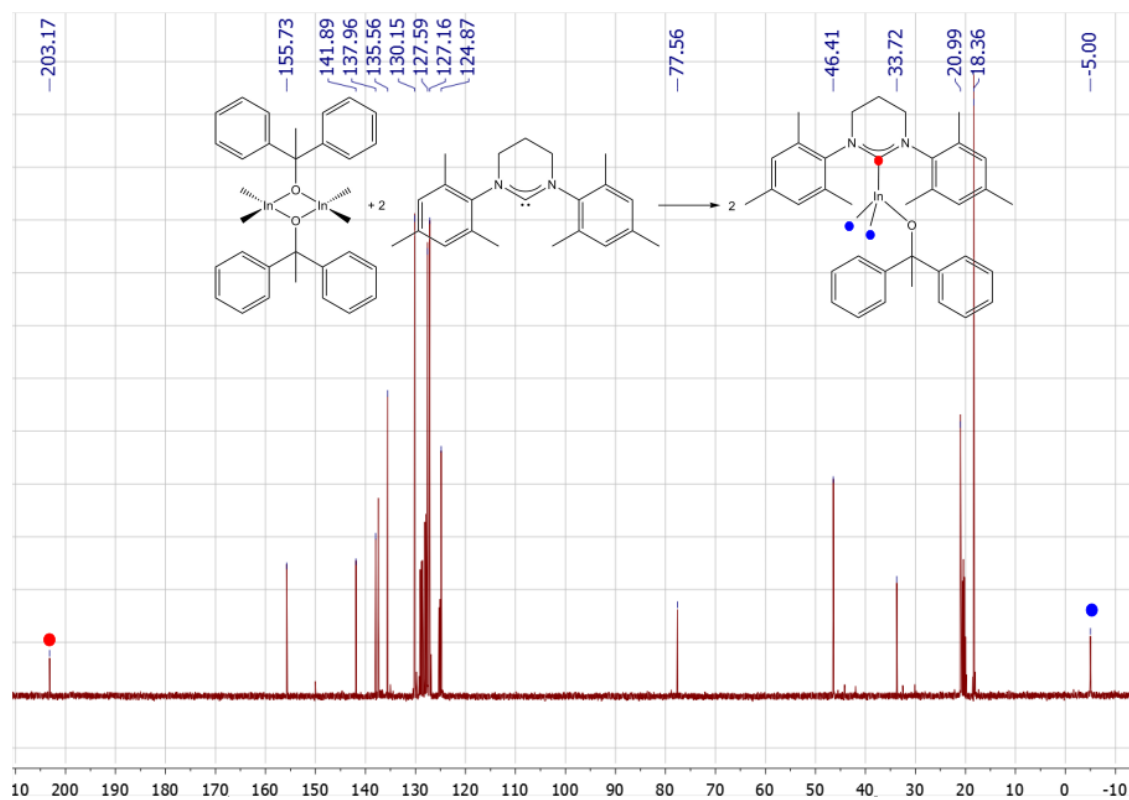

**Figure S 29.** <sup>13</sup>C NMR spectrum of the mixture of (S,S)-[Me<sub>2</sub>In(OCPh<sub>2</sub>CH<sub>3</sub>)<sub>2</sub>] and 6-Mes ([In]:[6-Mes] = 1:1) in toluene-*d*<sub>8</sub> (100 MHz).

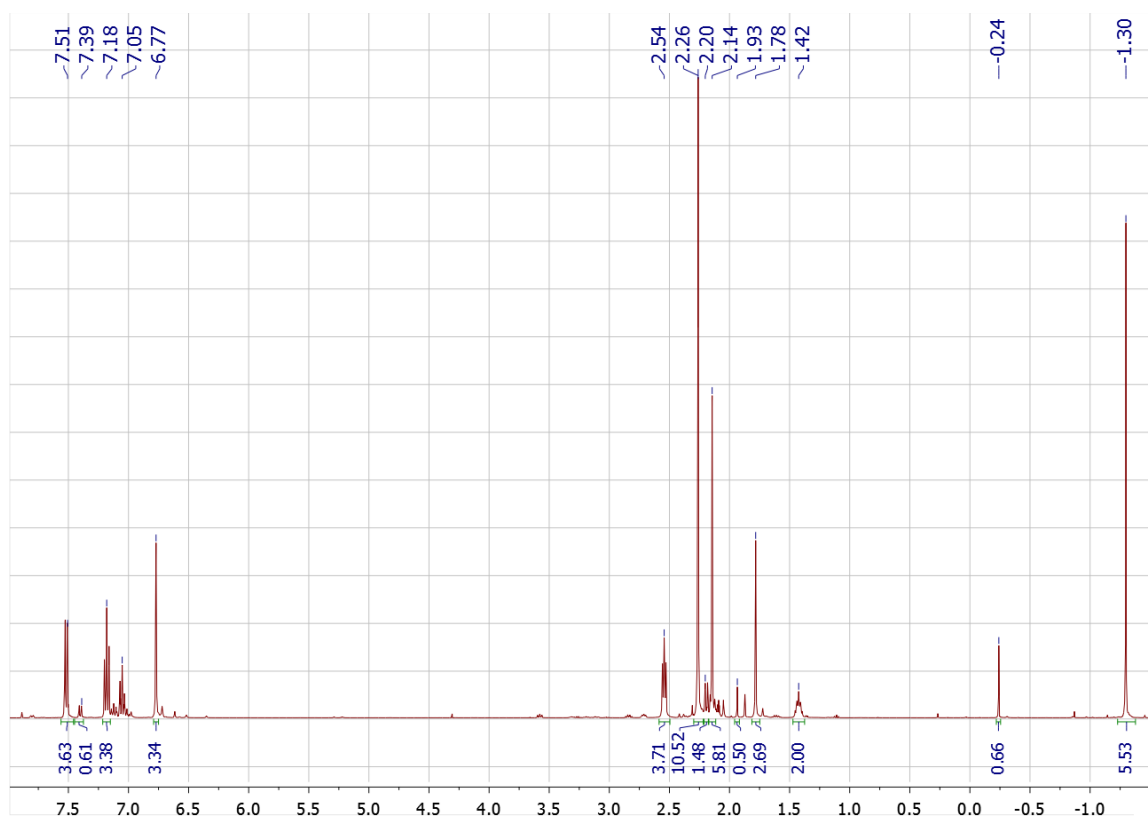

**Figure S 30.**  $^1\text{H}$  NMR spectrum of the mixture of  $(S,S)\text{-}[\text{Me}_2\text{In}(\text{OCPh}_2\text{CH}_3)]_2$  and 6-Mes ( $[\text{In}]:[6\text{-Mes}] = 1:1$ ) 24h after mixing in toluene- $d_8$  (400 MHz).

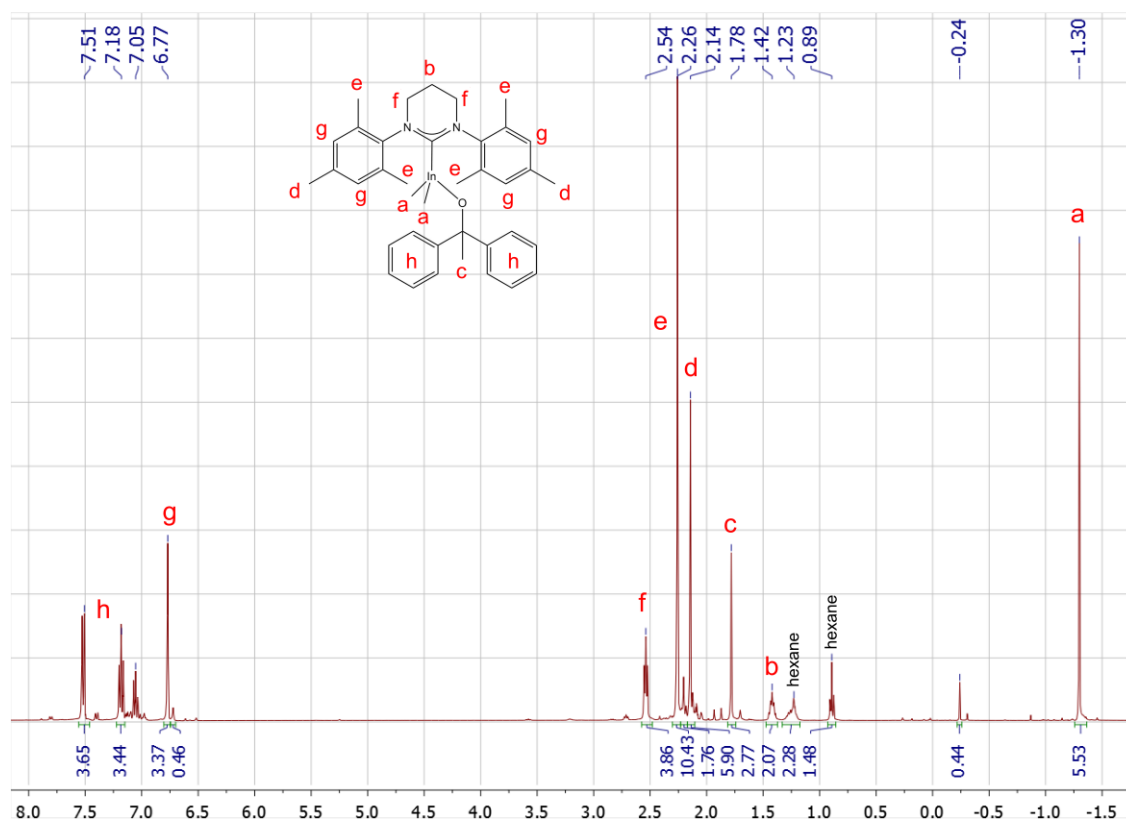

**Figure S 31.**  $^1\text{H}$  NMR spectrum of  $\text{Me}_2\text{In}(\text{OCPh}_2\text{CH}_3)(6\text{-Mes})$  (**4**) in toluene- $d_8$  (400 MHz).



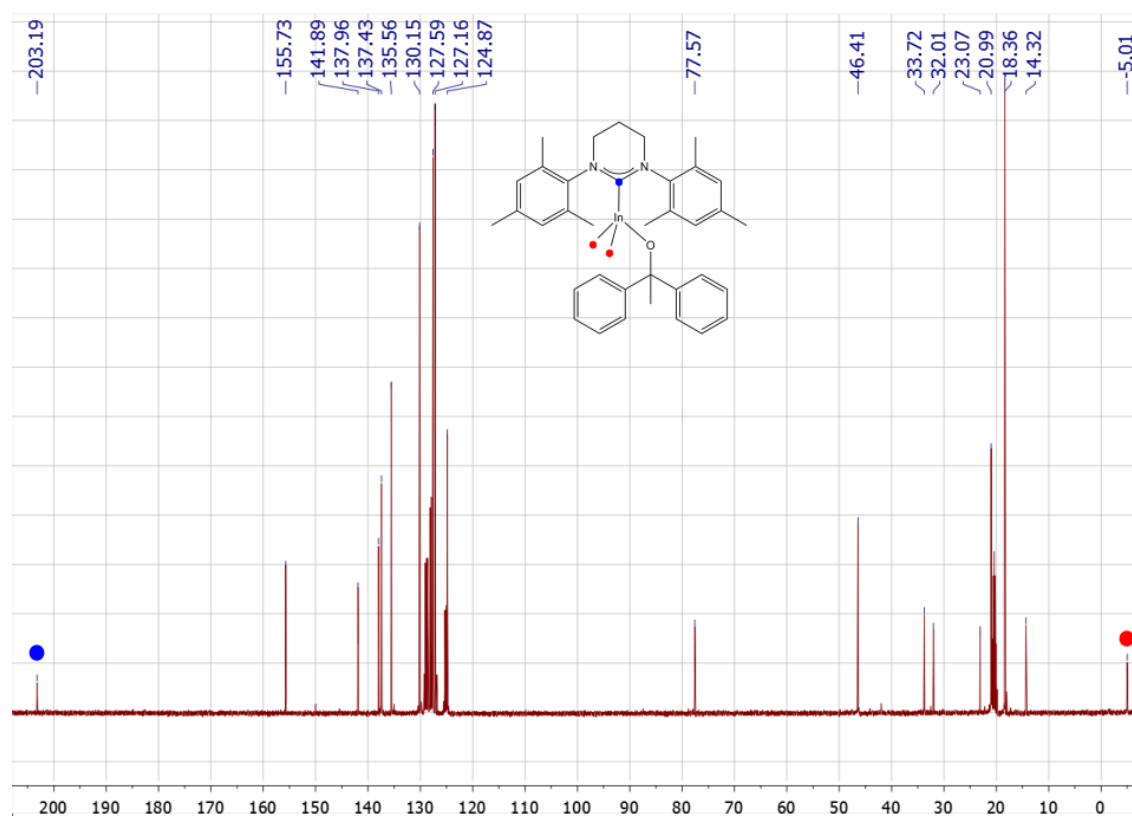

**Figure S 32.** <sup>13</sup>C NMR spectrum of Me<sub>2</sub>In(OCPh<sub>2</sub>CH<sub>3</sub>)(6-Mes) (**4**) in toluene-*d*<sub>8</sub> (100 MHz).

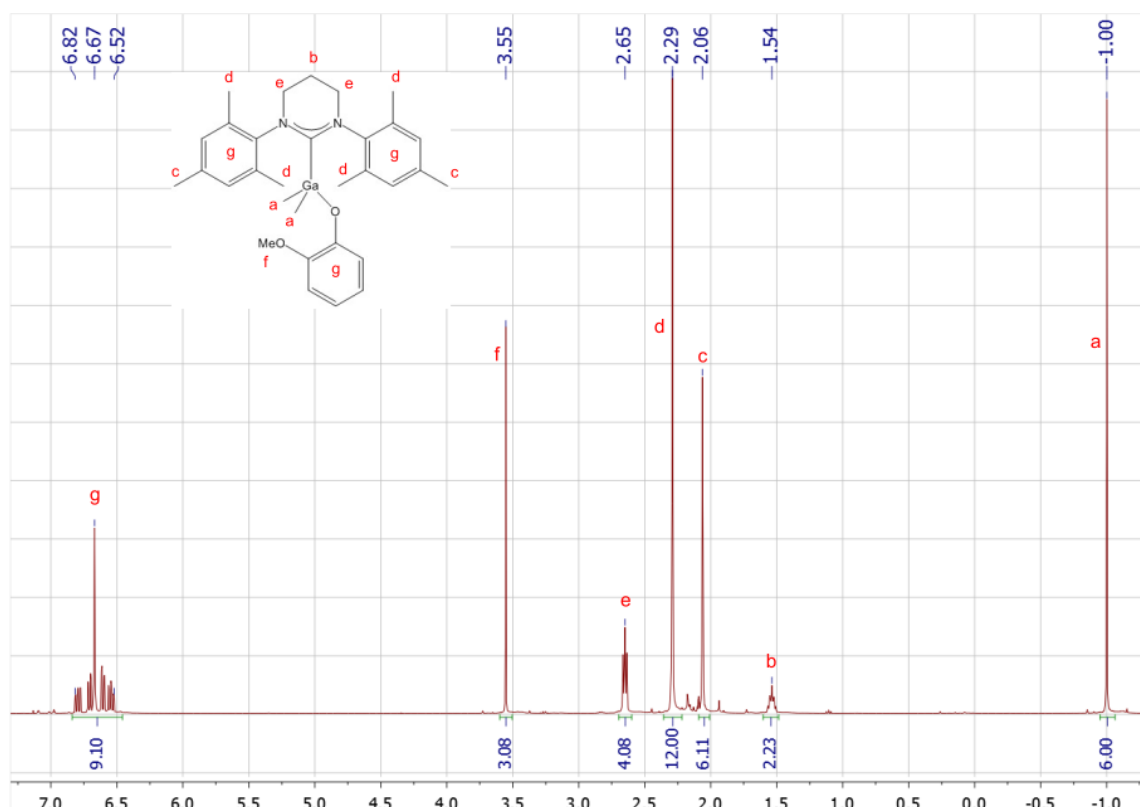

**Figure S 33.** <sup>1</sup>H NMR spectrum of Me<sub>2</sub>Ga(OC<sub>6</sub>H<sub>4</sub>OMe)(6-Mes) (**5**) in toluene-*d*<sub>8</sub> (400 MHz).

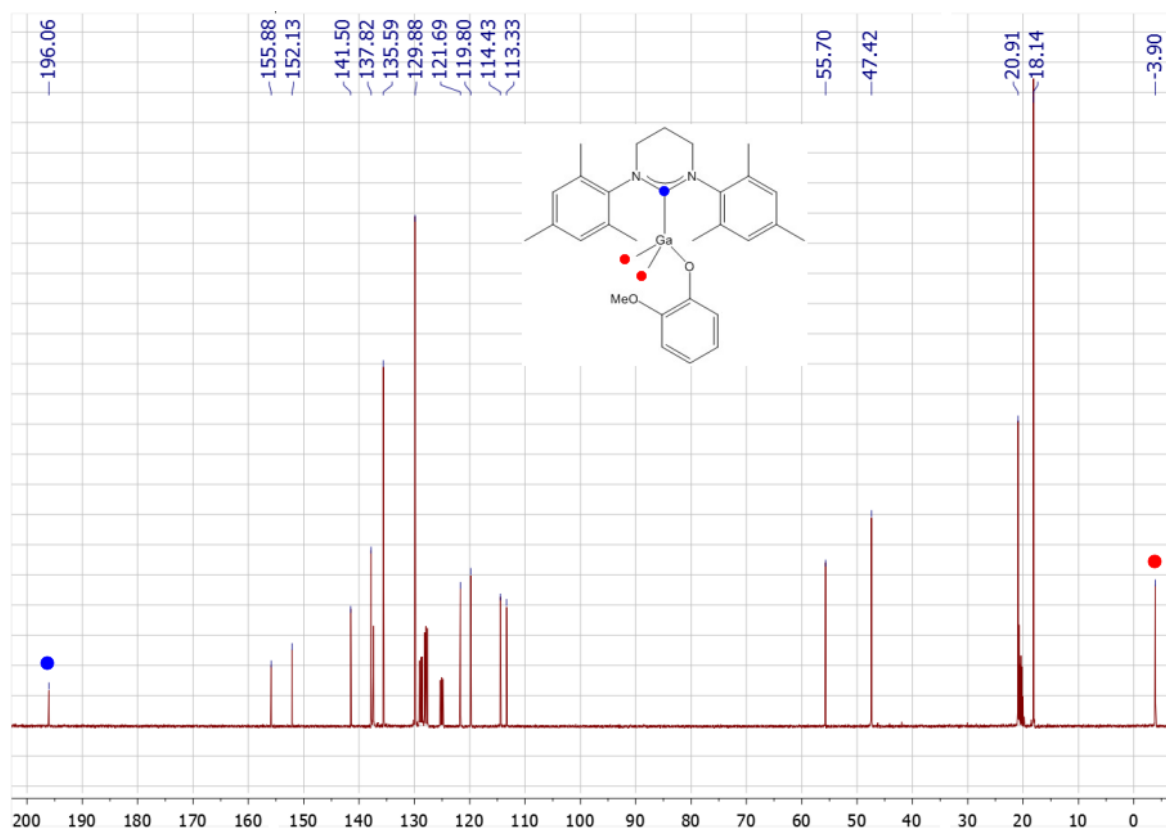

**Figure S 34.** <sup>13</sup>C NMR spectrum of the mixture of  $\text{Me}_2\text{Ga}(\text{OC}_6\text{H}_4\text{OMe})(6\text{-Mes})$  (**5**) in  $\text{toluene-}d_8$  (100 MHz).

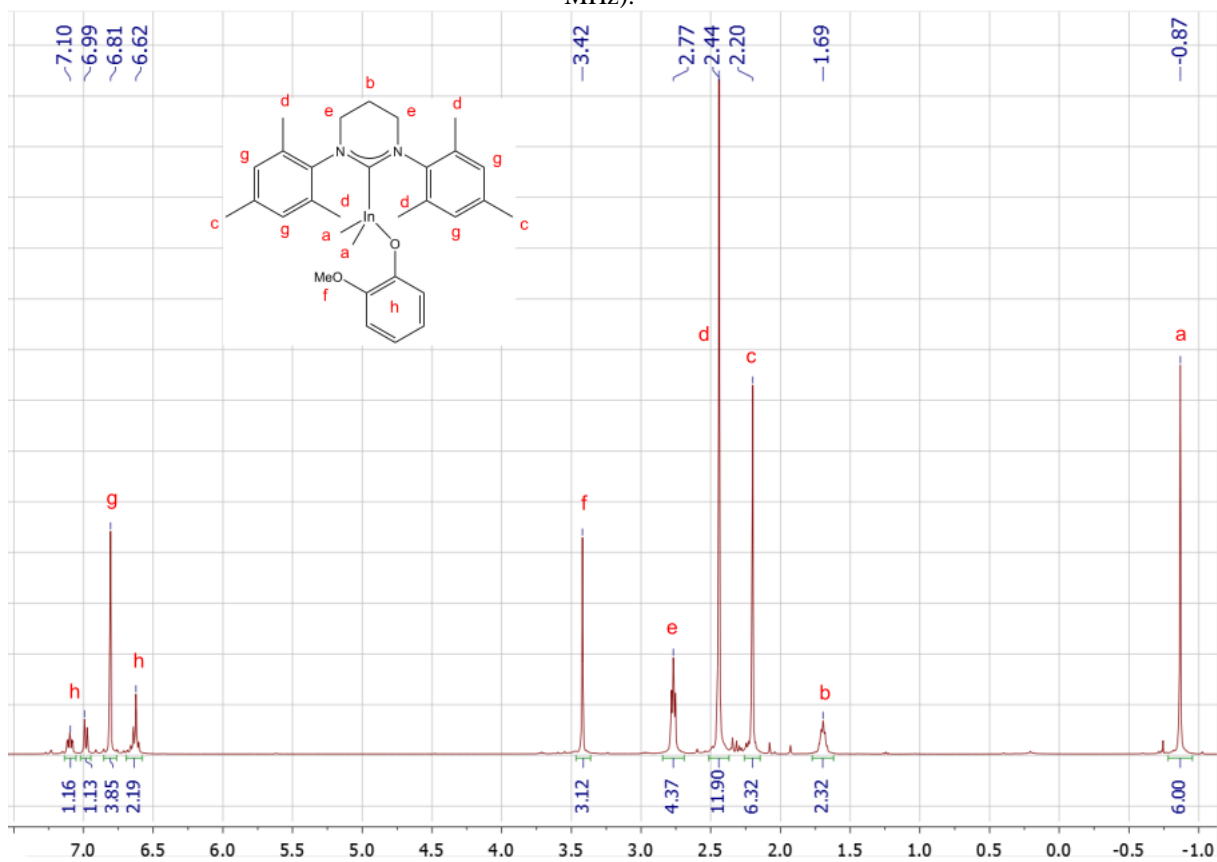

**Figure S 35.** <sup>1</sup>H NMR spectrum of  $\text{Me}_2\text{In}(\text{OC}_6\text{H}_4\text{OMe})(6\text{-Mes})$  (**6**) in  $\text{toluene-}d_8$  (400 MHz).

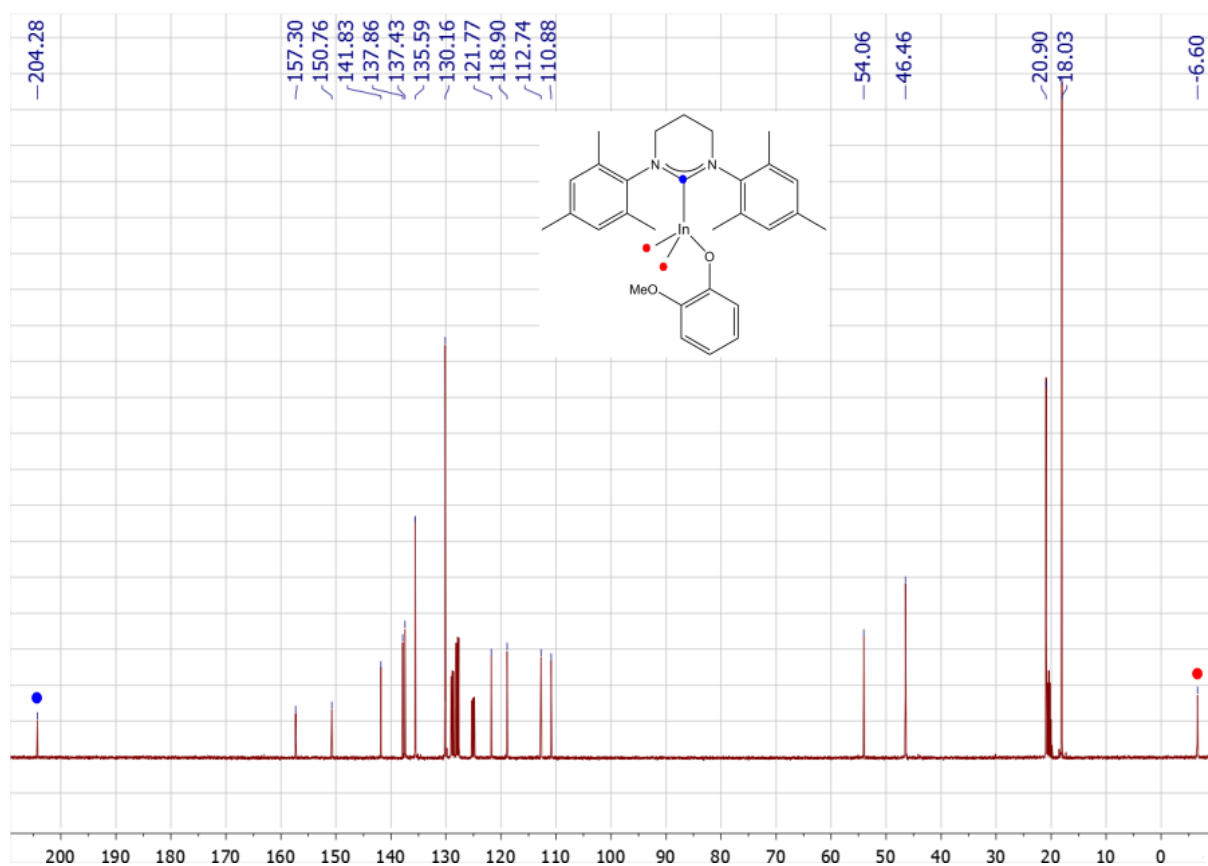

**Figure S 36.**  $^{13}\text{C}$  NMR spectrum of  $\text{Me}_2\text{In}(\text{OC}_6\text{H}_4\text{OMe})(6\text{-Mes})$  (6) in toluene- $d_8$  (100 MHz).

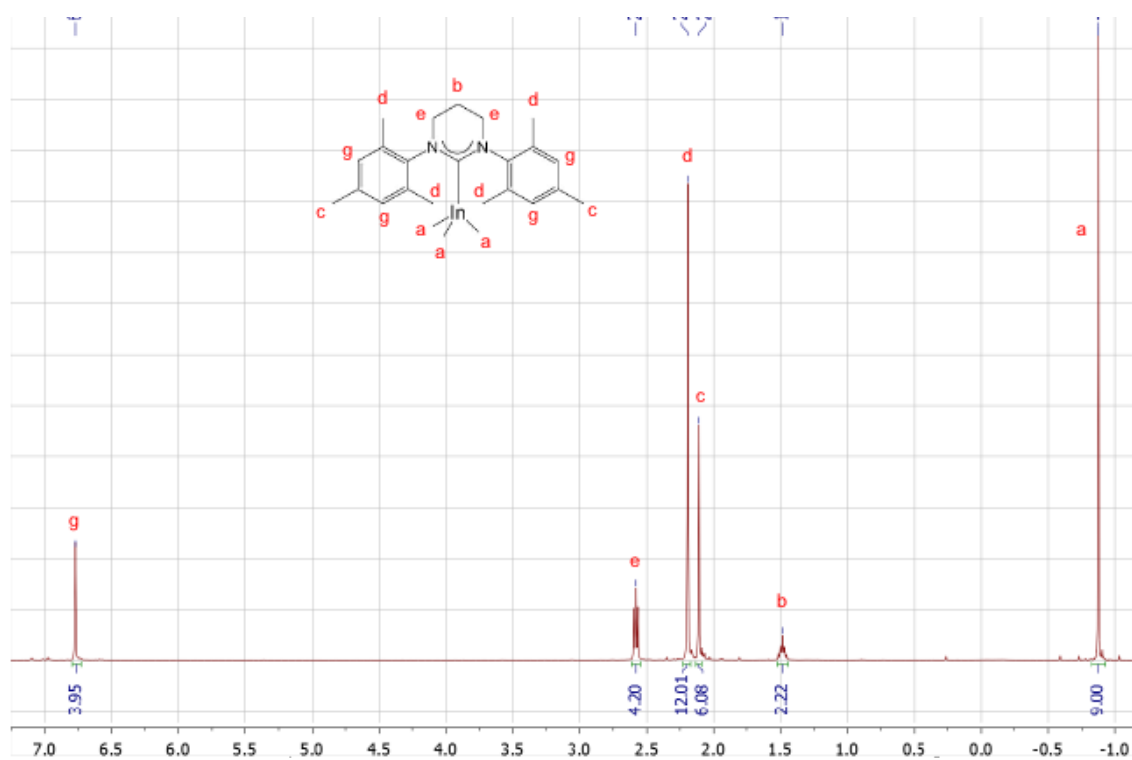

**Figure S 37.**  $^1\text{H}$  NMR spectrum of  $\text{Me}_3\text{In}(6\text{-Mes})$  (2) in toluene- $d_8$  (400 MHz).

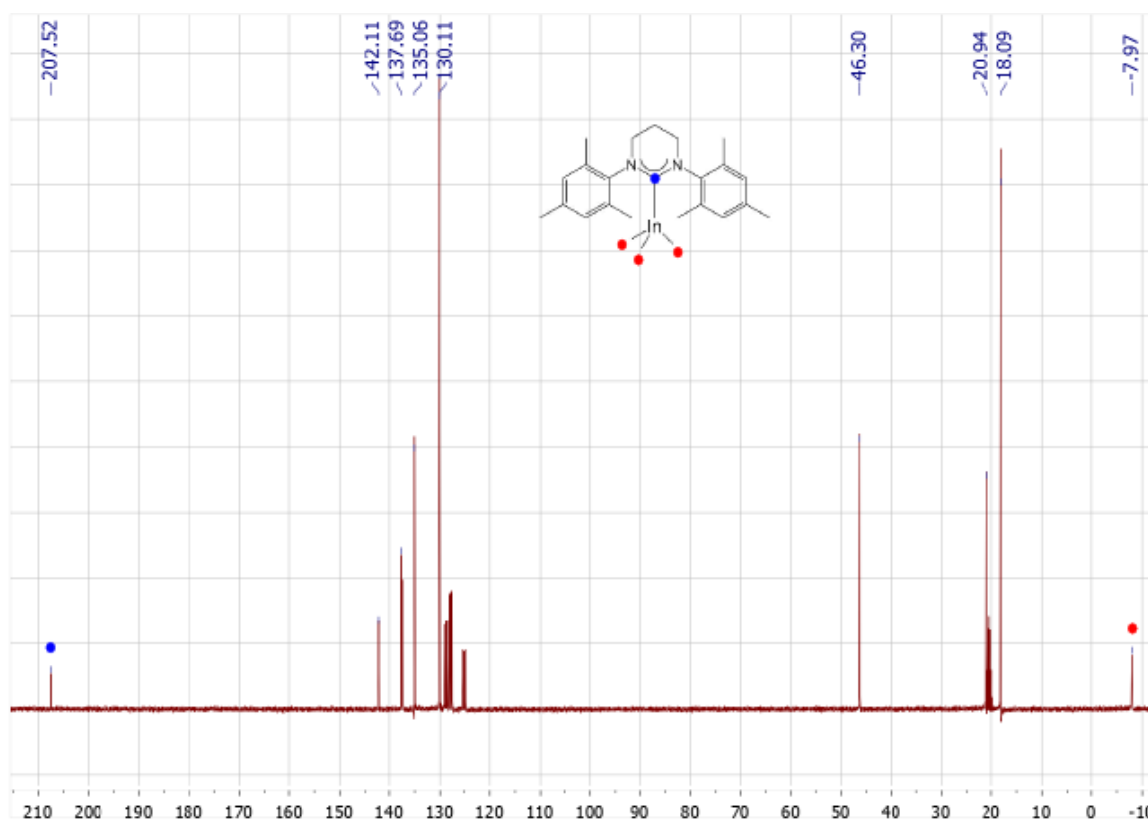

**Figure S 3.**  $^{13}\text{C}$  NMR spectrum of  $\text{Me}_3\text{In}(\text{6-Mes})$  (**2**) in  $\text{toluene-}d_8$  (100 MHz).

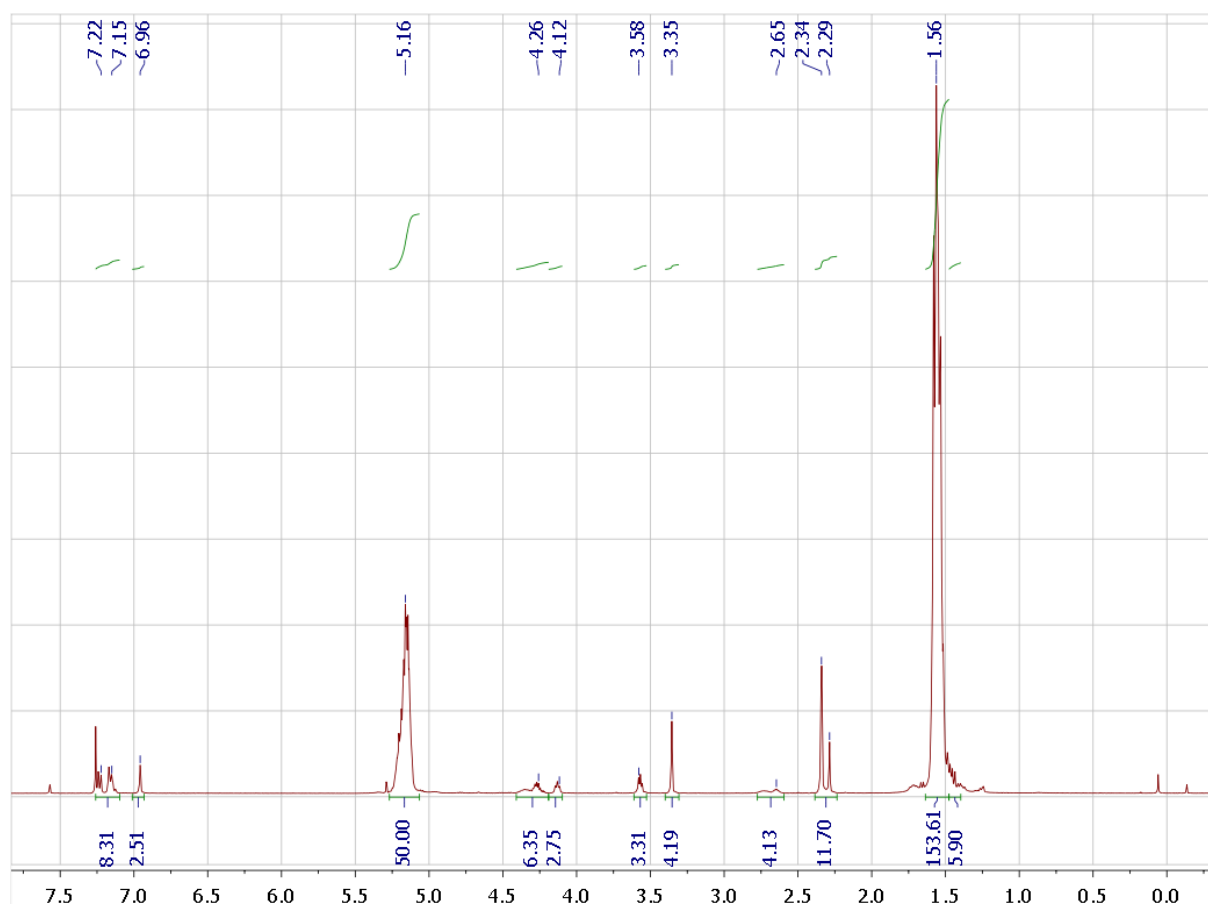

**Figure S 39.**  $^1\text{H}$  NMR spectrum of PLA prepared by polymerization of *rac*-LA with **1** (toluene, rt, 10 min.);  $\text{CDCl}_3$ .

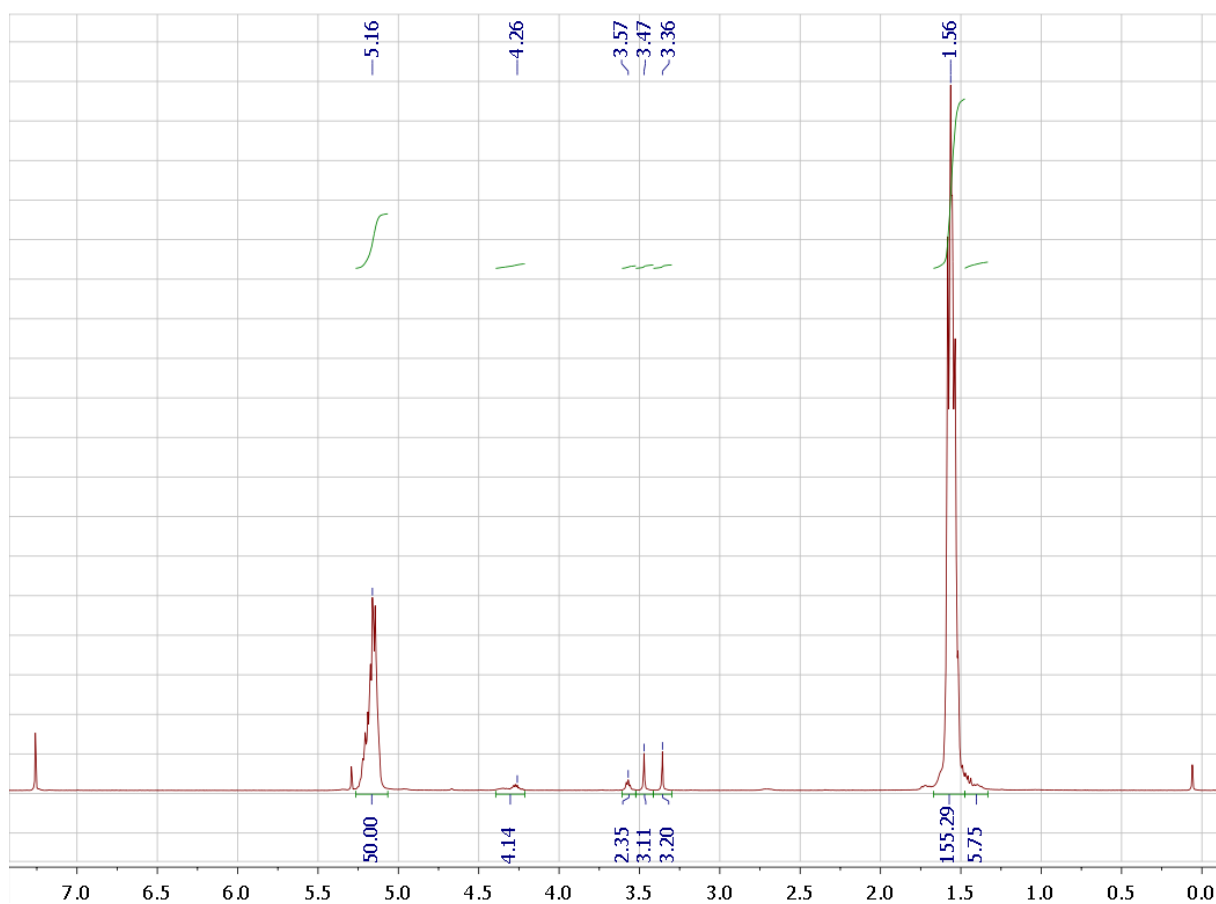

**Figure S 40.** <sup>1</sup>H NMR spectrum of precipitated PLA prepared by polymerization of *rac*-LA with **1** as catalyst

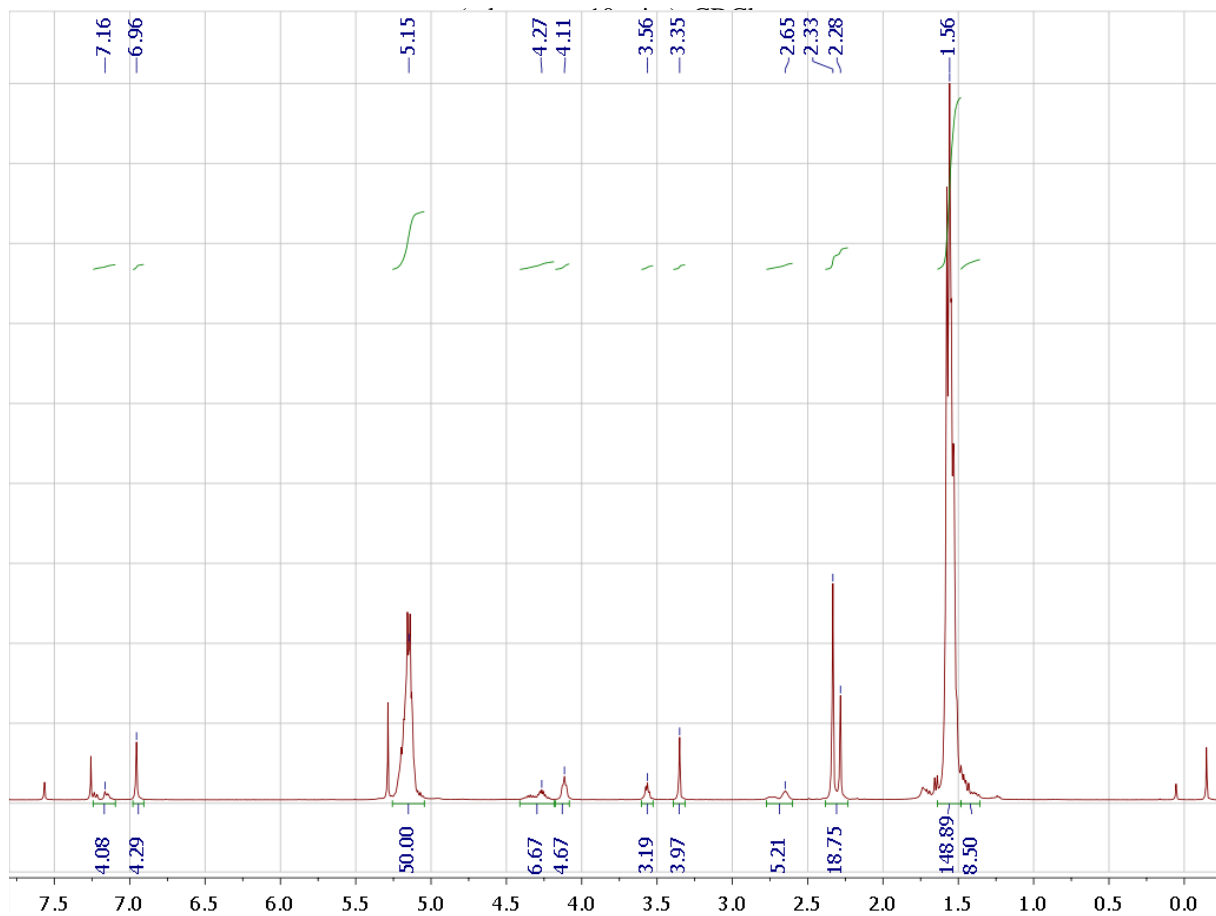

**Figure S 41.** <sup>1</sup>H NMR spectrum of PLA prepared by polymerization of *rac*-LA with **1** (toluene, -20°C, 12h); CDCl<sub>3</sub>.

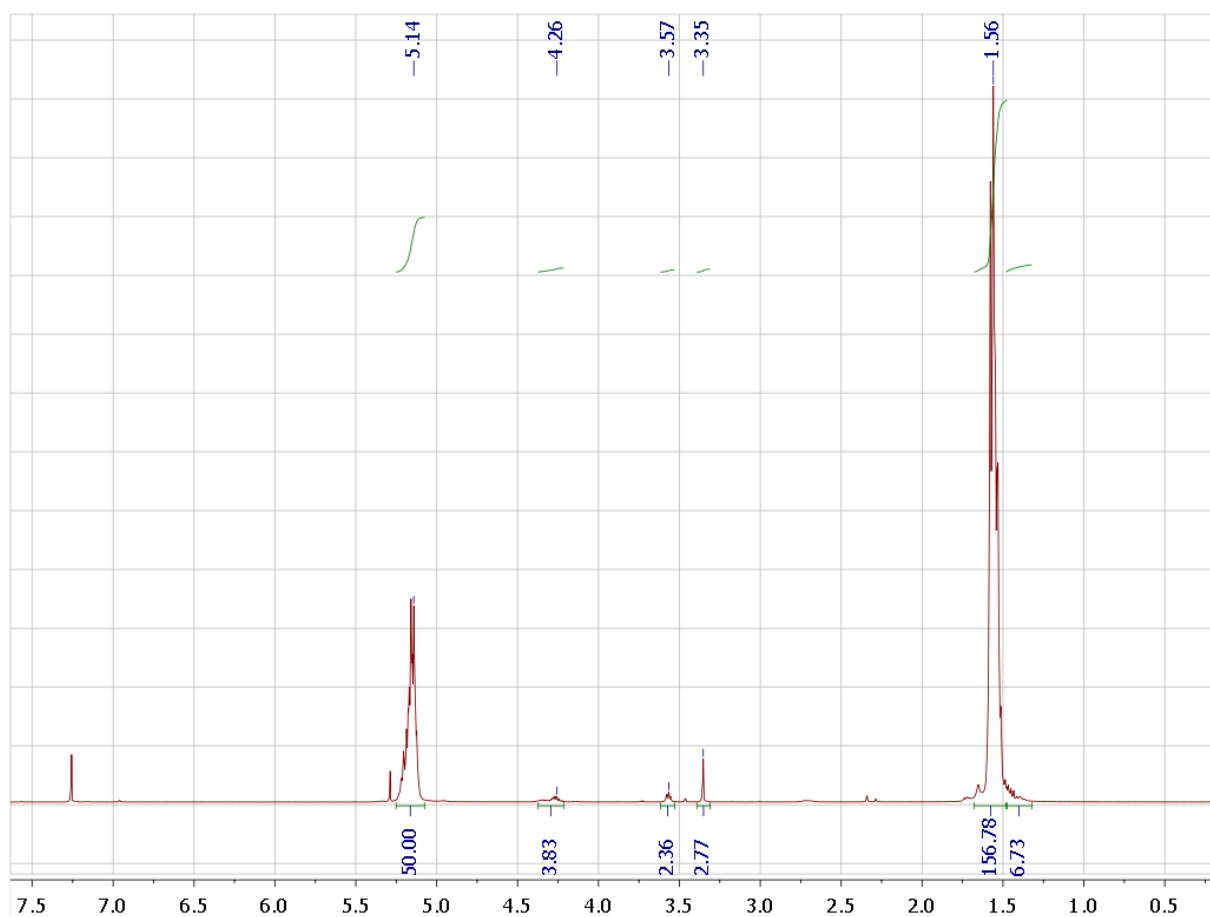

**Figure S 42.**  $^1\text{H}$  NMR spectrum of precipitated PLA prepared by polymerization of *rac*-LA with **1** as catalyst (toluene,  $-20^\circ\text{C}$ , 12h);  $\text{CDCl}_3$ .

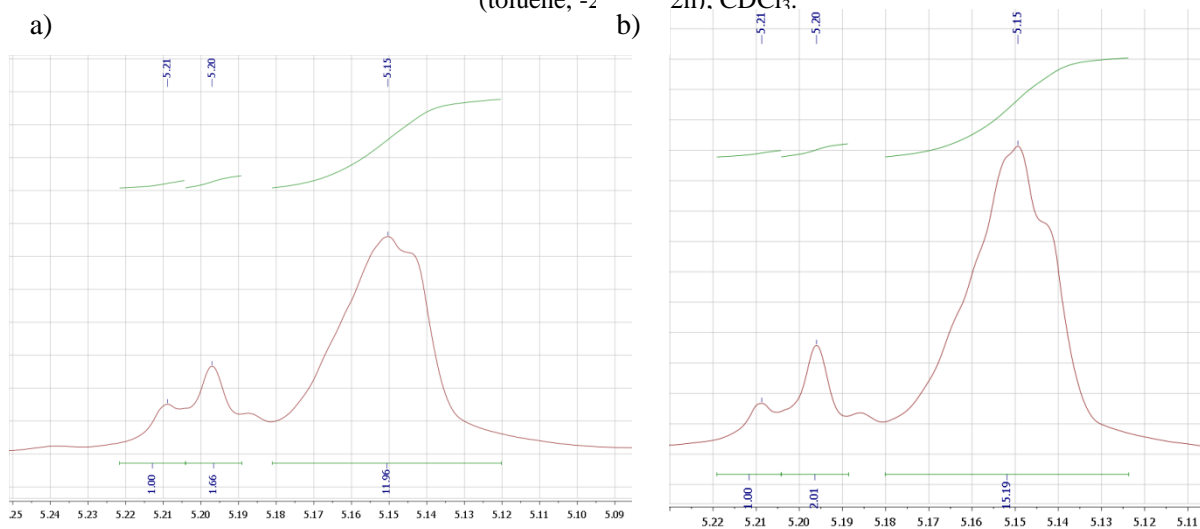

**Figure S 43.** Homonuclear decoupled  $^1\text{H}$  NMR ( $\text{CDCl}_3$ , 400MHz,) spectra of the methine region of polylactide prepared by polymerization of *rac*-LA with **1** a) in toluene, rt, 10 min.;  $P_m = 0.63$ ; b) in toluene,  $-20^\circ\text{C}$ , 12h;  $P_m = 0.66$ .

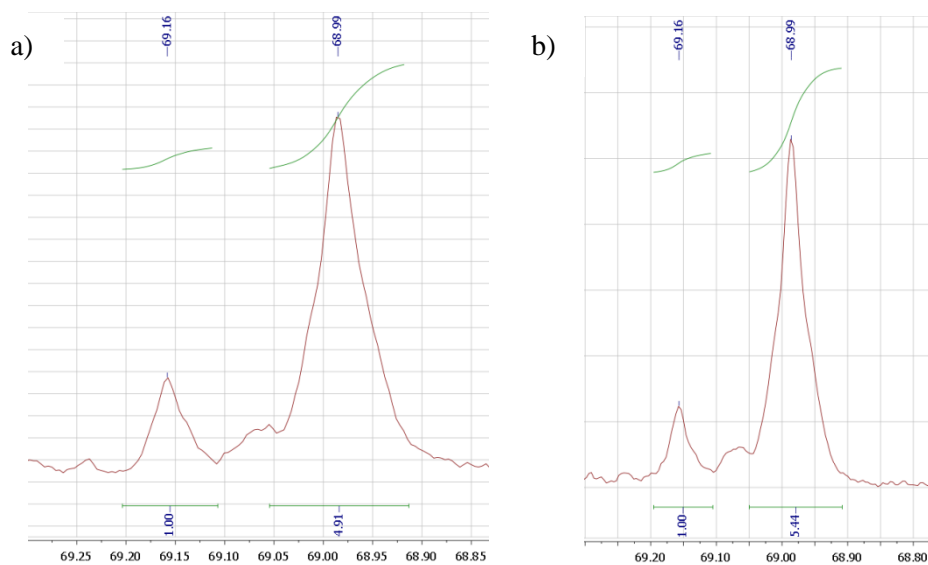

**Figure S 44.**  $^{13}\text{C}$  NMR (CDCl<sub>3</sub>, 100MHz,) spectra of the methine region of polylactide prepared by polymerization of *rac*-LA with **1** a) in toluene, rt, 10 min.,  $P_m = 0.66$ ; b) in toluene, -20°C, 12h,  $P_m = 0.69$ .

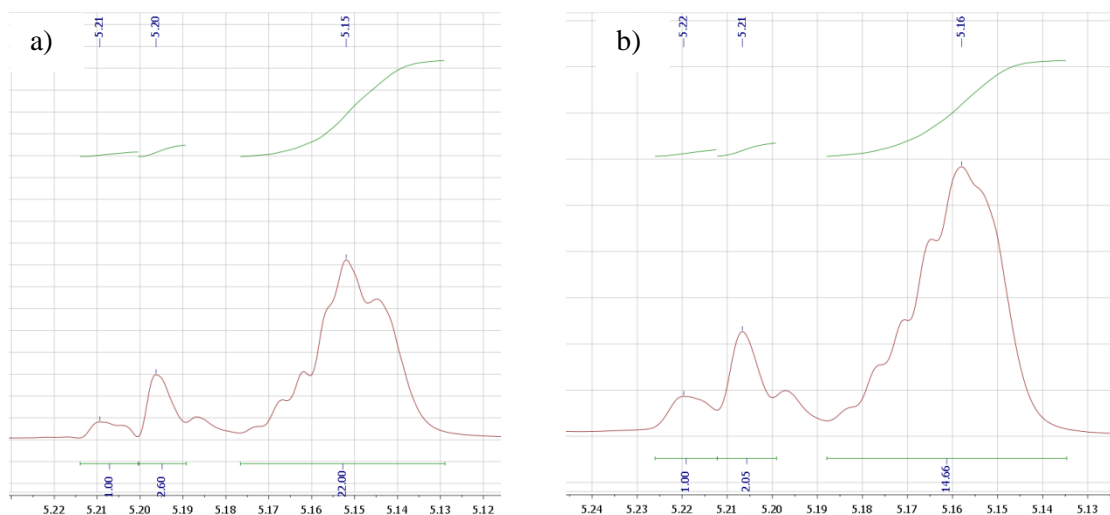

**Figure S 45.** Homonuclear decoupled  $^1\text{H}$  NMR (CDCl<sub>3</sub>, 400MHz,) spectra of the methine region of polylactide prepared by polymerization of *rac*-LA with a) **6**, in methylene chloride, -20°C, 3h,  $P_m = 0.72$ ; b) **4**, in methylene chloride, -20°C, 3h,  $P_m = 0.67$ .

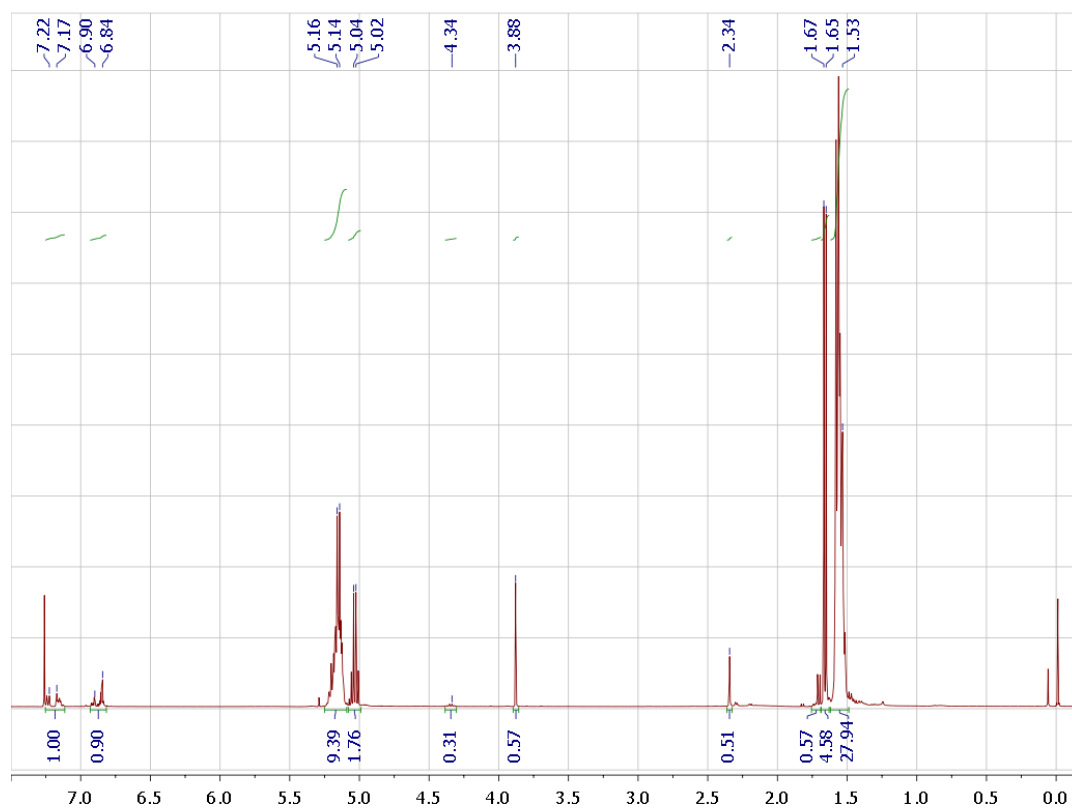

**Figure S 46.**  $^1\text{H}$  NMR spectrum of PLA prepared by polymerization of *rac*-LA with **6** as catalyst ( $\text{CH}_2\text{Cl}_2$ ,  $-20^\circ\text{C}$ , 3h);  $\text{CDCl}_3$ .

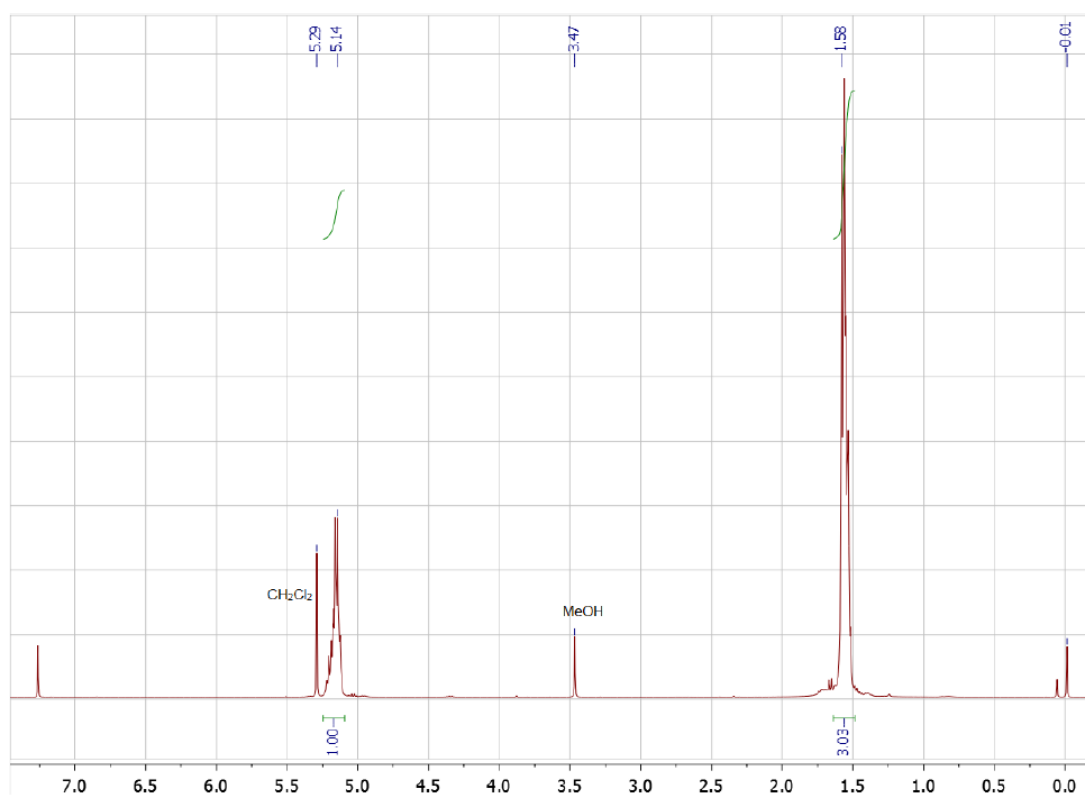

**Figure S 47.**  $^1\text{H}$  NMR spectrum of precipitated PLA prepared by polymerization of *rac*-LA with **6** as catalyst ( $\text{CH}_2\text{Cl}_2$ ,  $-20^\circ\text{C}$ , 3h);  $\text{CDCl}_3$ .



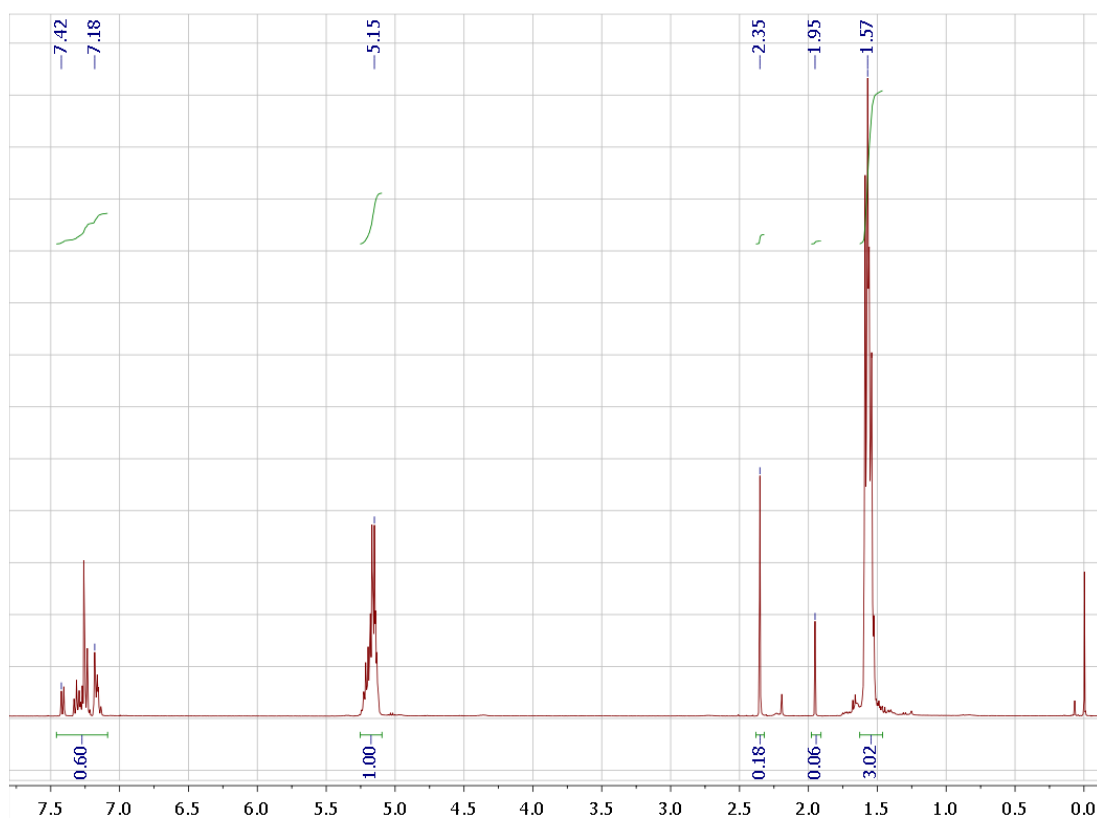

**Figure S 48.** <sup>1</sup>H NMR spectrum of PLA prepared by polymerization of *rac*-LA with **4** as catalyst (CH<sub>2</sub>Cl<sub>2</sub>, -20°C, 3h); CDCl<sub>3</sub>.

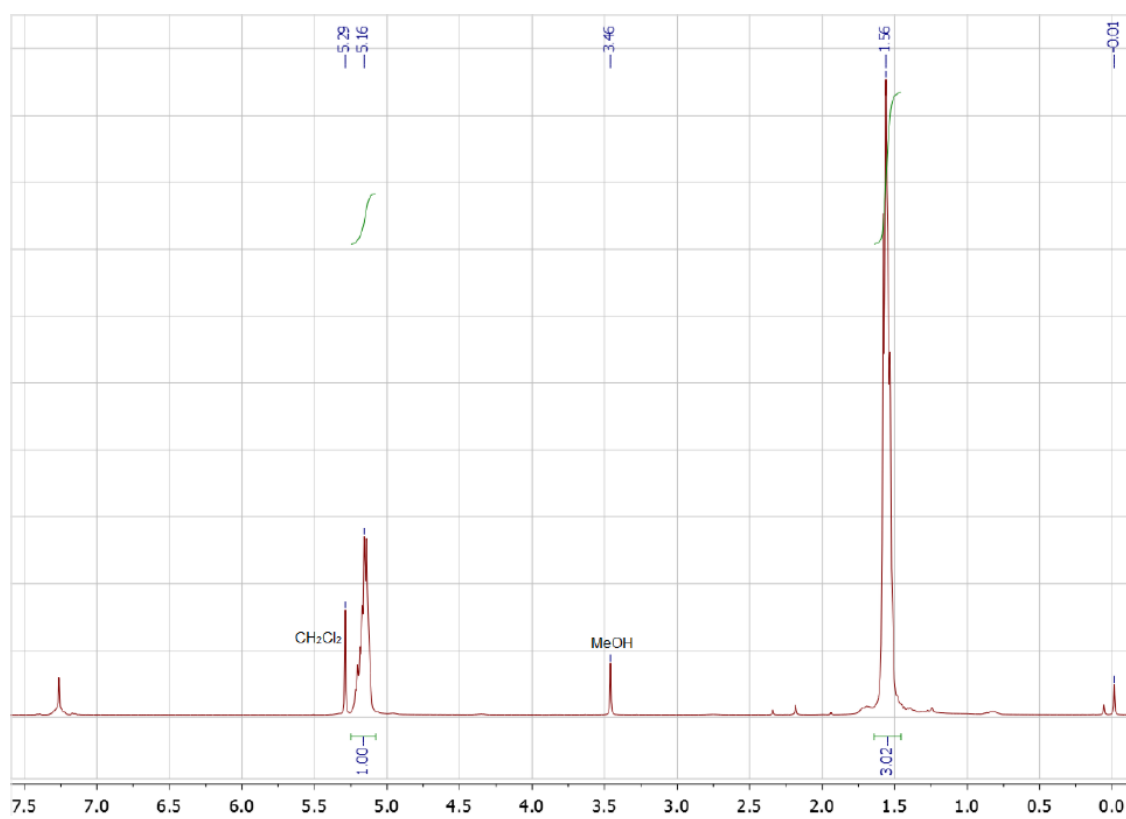

**Figure S 49.** <sup>1</sup>H NMR spectrum of precipitated PLA prepared by polymerization of *rac*-LA with **4** as catalyst (CH<sub>2</sub>Cl<sub>2</sub>, -20°C, 3h); CDCl<sub>3</sub>.

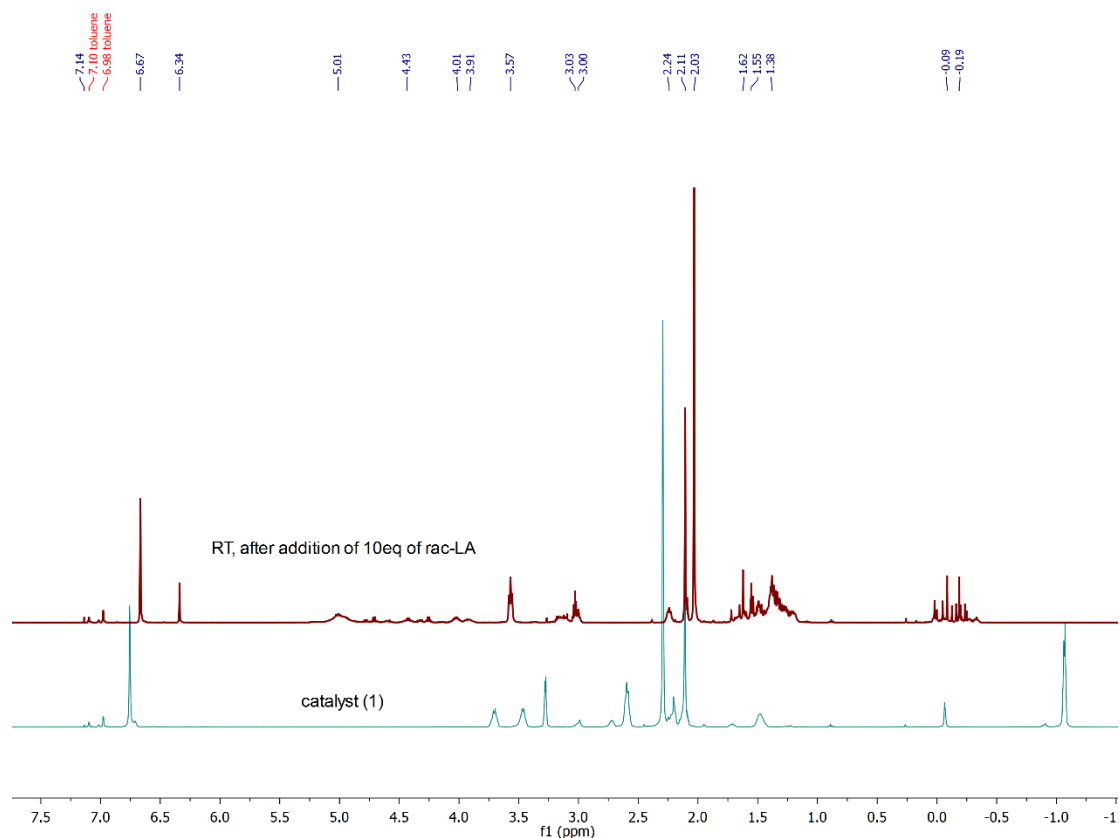

**Figure S 50.**  $^1\text{H}$  NMR spectrum of the reaction of **1** with 10 eq of *rac*-LA at room temperature (red), compared to the spectrum of the catalyst (**1**, green) (toluene- $d_8$ , 400 MHz).

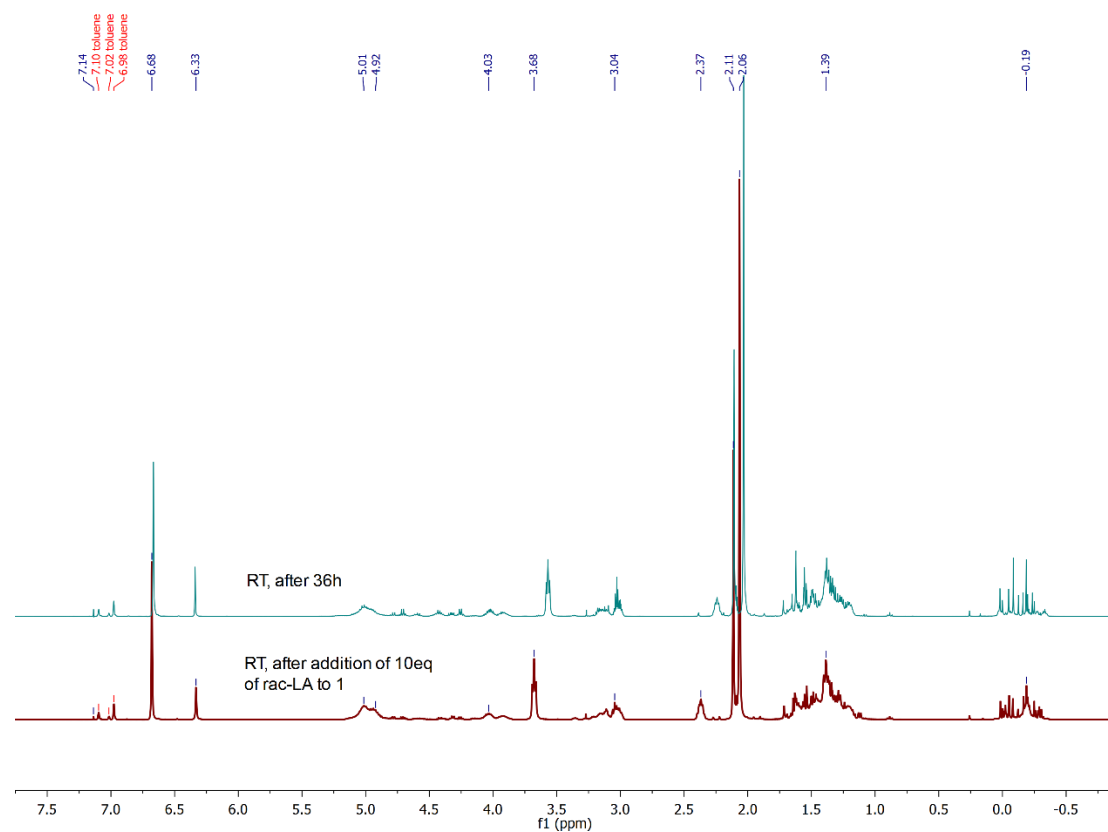

**Figure S 51.**  $^1\text{H}$  NMR spectrum of the reaction of **1** with 10 eq of *rac*-LA at room temperature (red), and the same reaction mixture after 36 hours (green) (toluene- $d_8$ , 400 MHz).

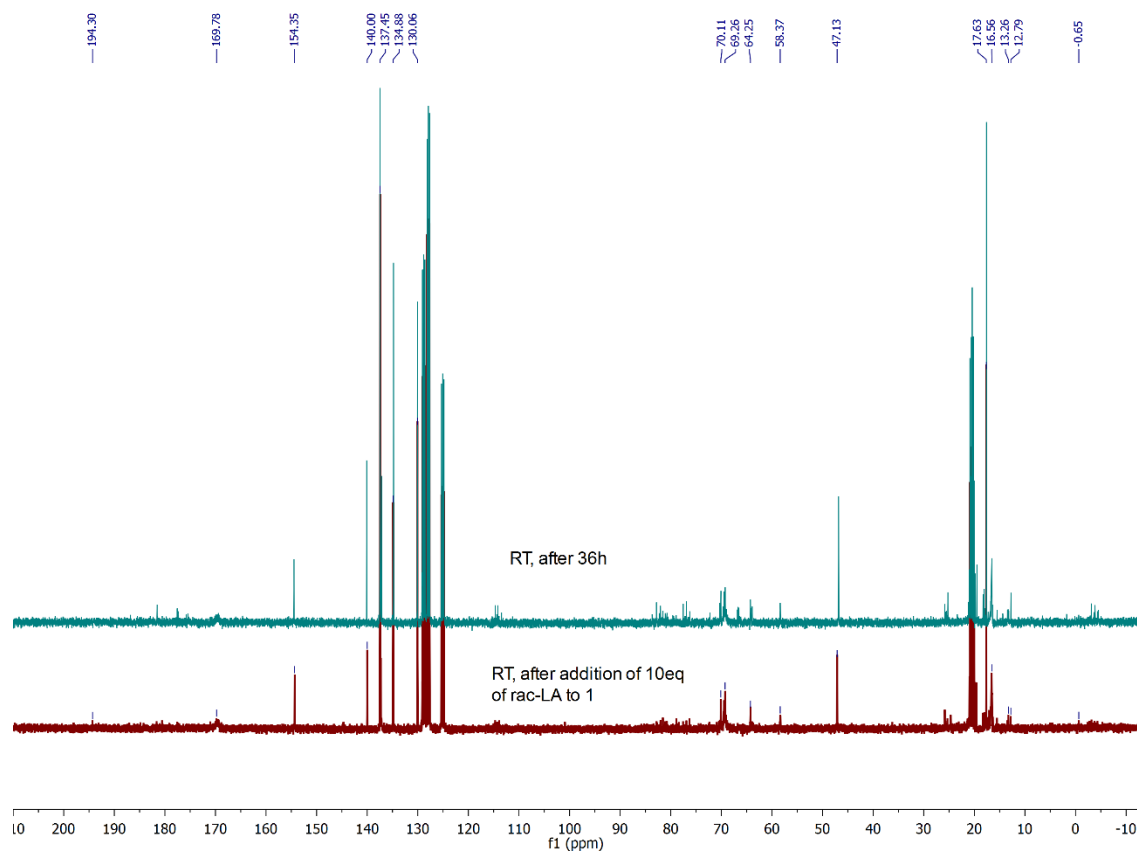

**Figure S 52.**  $^{13}\text{C}$  NMR spectrum of the reaction of **1** with 10 eq of *rac*-LA at room temperature (red), and the same reaction mixture after 36 hours (green) (toluene- $d_8$ , 100 MHz).

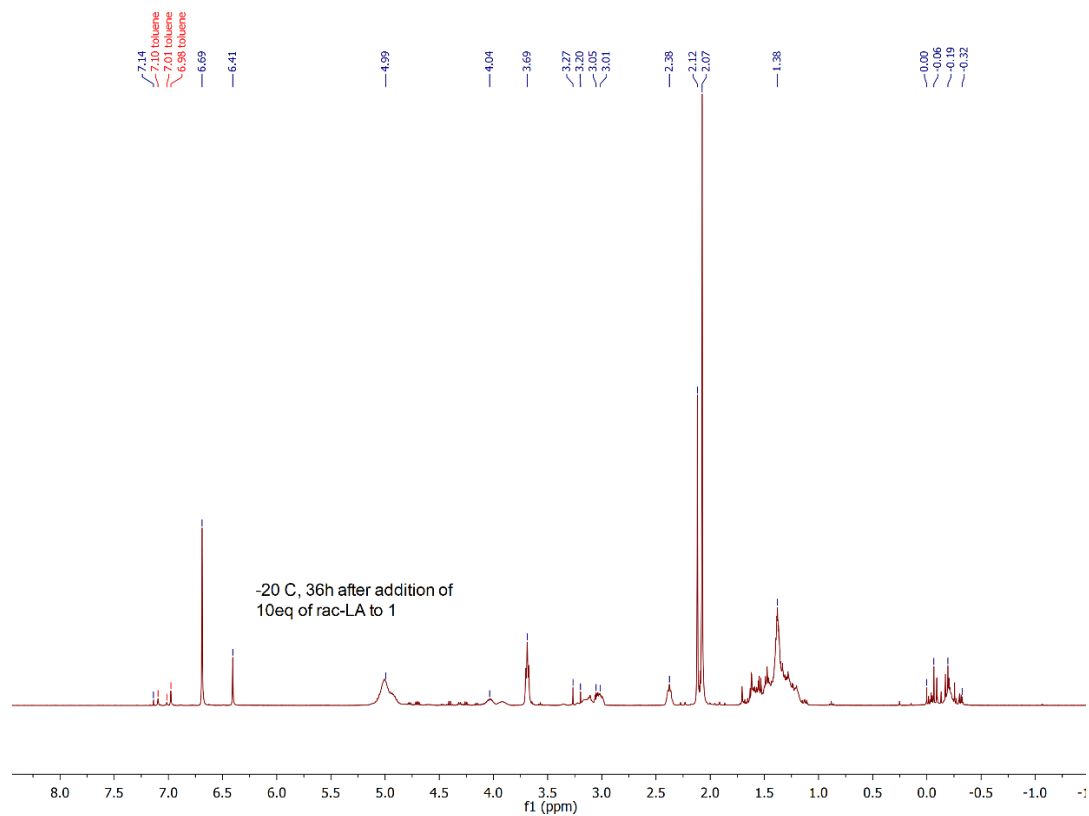

**Figure S 53.**  $^1\text{H}$  NMR spectrum of the reaction of **1** with 10 eq of *rac*-LA at  $-20^\circ\text{C}$ , after 36 hours (toluene- $d_8$ , 400 MHz).

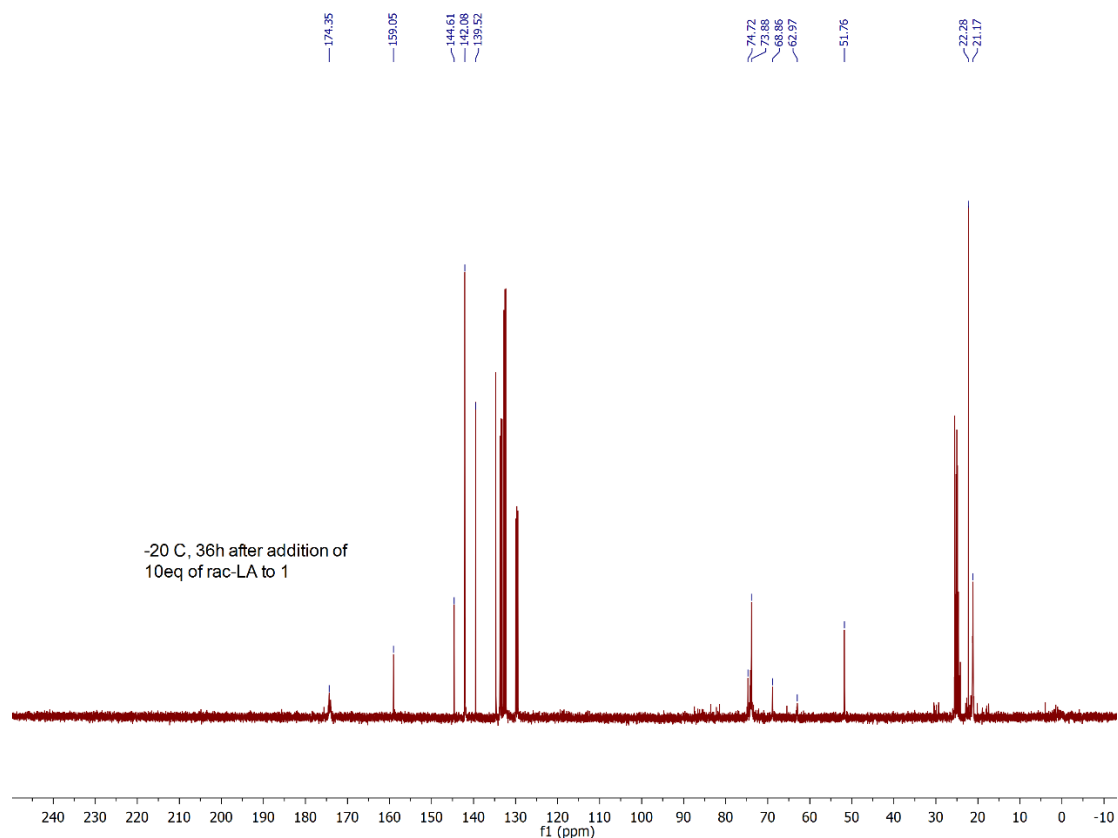

**Figure S 54.**  $^{13}\text{C}$  NMR spectrum of the reaction of **1** with 10 eq of *rac*-LA at at  $-20^\circ\text{C}$ , after 36 hours (toluene- $d_8$ , 100 MHz).

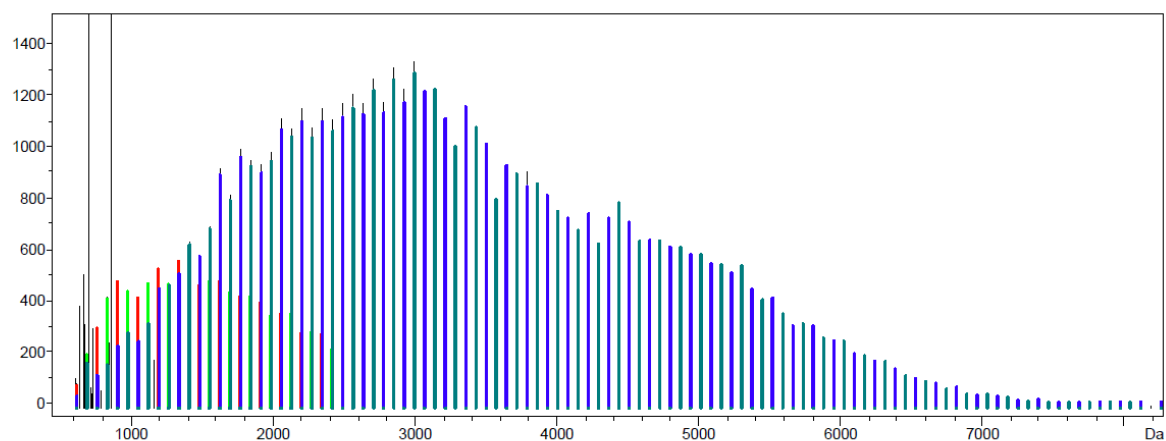

| n | ser. | rep.unit | resid.  | end1 | end2 | cation  | Mn      | Mw      | pd      | DP      | % I. | cnt |
|---|------|----------|---------|------|------|---------|---------|---------|---------|---------|------|-----|
| 1 | 1    | 144.018  | 0.19804 |      |      | 38.9637 | 1479.65 | 1645.97 | 1.11240 | 10.2741 | 7    | 14  |
| 2 | 2    | 144.018  | 4.06095 |      |      | 38.9637 | 3298.42 | 3879.97 | 1.17631 | 22.9028 | 38.3 | 57  |
| 3 | 3    | 144.018  | 72.2133 |      |      | 38.9637 | 1508.88 | 1685.37 | 1.11697 | 10.4770 | 6.8  | 14  |
| 4 | 4    | 144.018  | 76.0900 |      |      | 38.9637 | 3295.54 | 3877.57 | 1.17661 | 22.8828 | 37.9 | 52  |

**Figure S 55.** MALDI-TOF spectrum of PLA (**T-2-(3-(4-*t*-butyl-phenyl)-2-methyl-2-propenylidene) malononitrile (DCTB)** was used as a matrix) obtained by polymerization of 25 equiv. of *rac*-LA with **1** as initiator, in toluene, rt, 10 min.

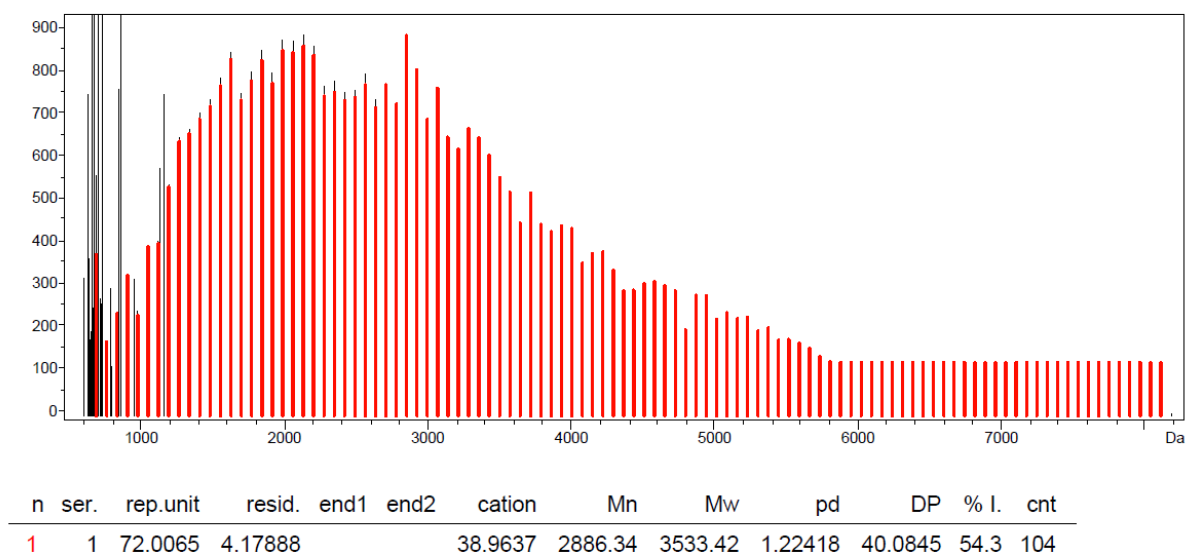

**Figure S 56.** MALDI-TOF spectrum of PLA (T-2-(3-(4-*t*-butyl-phenyl)-2-methyl-2-propenylidene) malononitrile (DCTB) was used as a matrix) obtained by polymerization of 25 equiv. of *rac*-LA with 1as initiator, in toluene, -20°C, 12h.

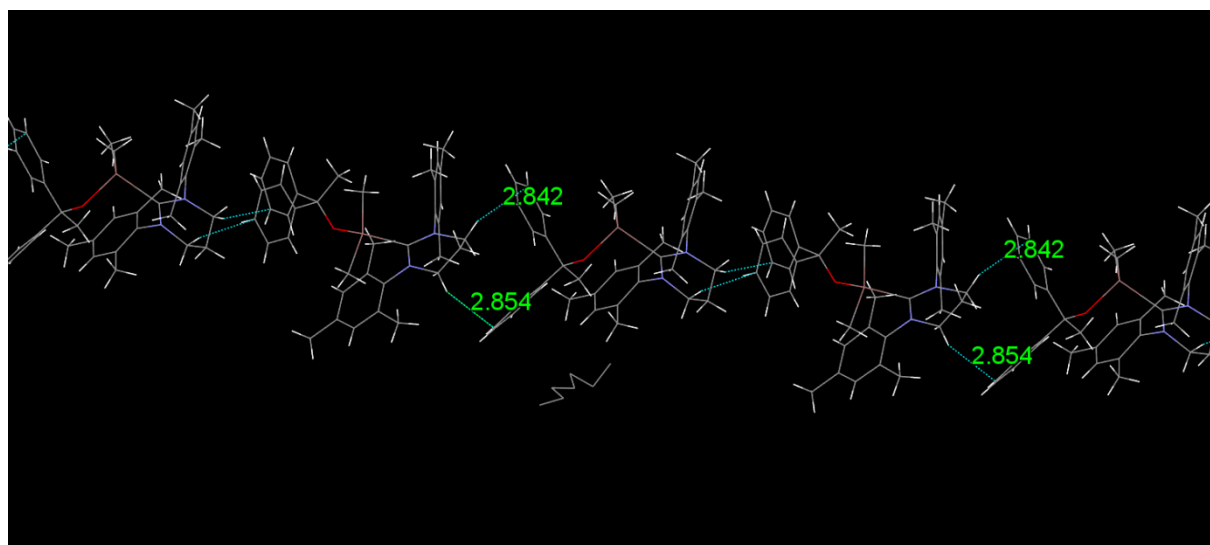

**Figure S 57.** Weak intermolecular interactions within the crystal structure of  $\text{Me}_2\text{In}(\text{OPh}_2\text{Me})(6\text{-Mes})$  (4).

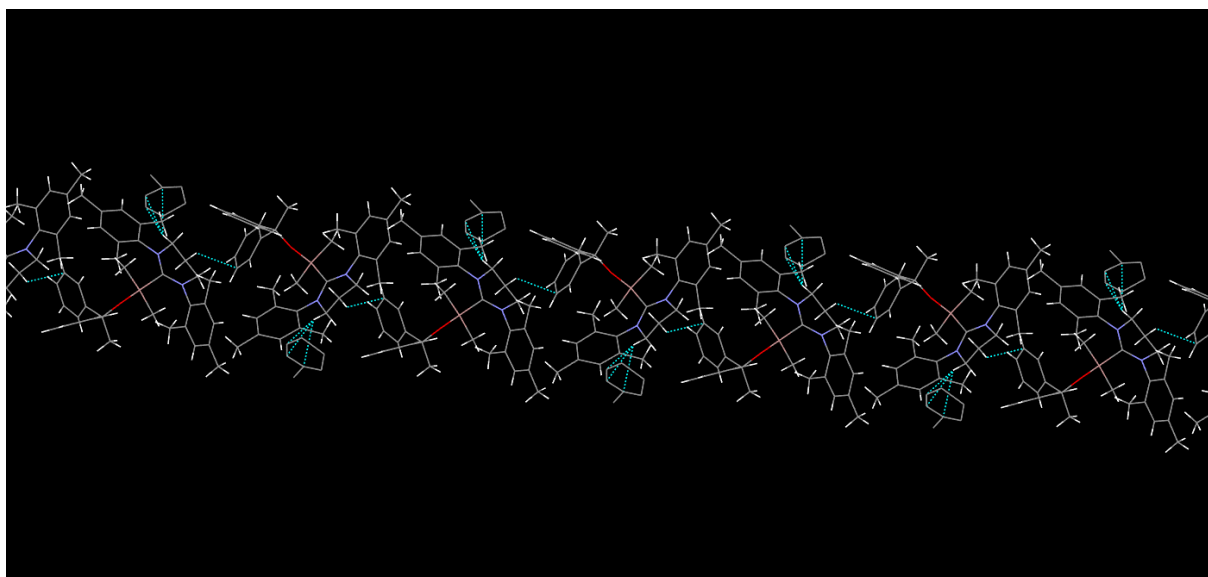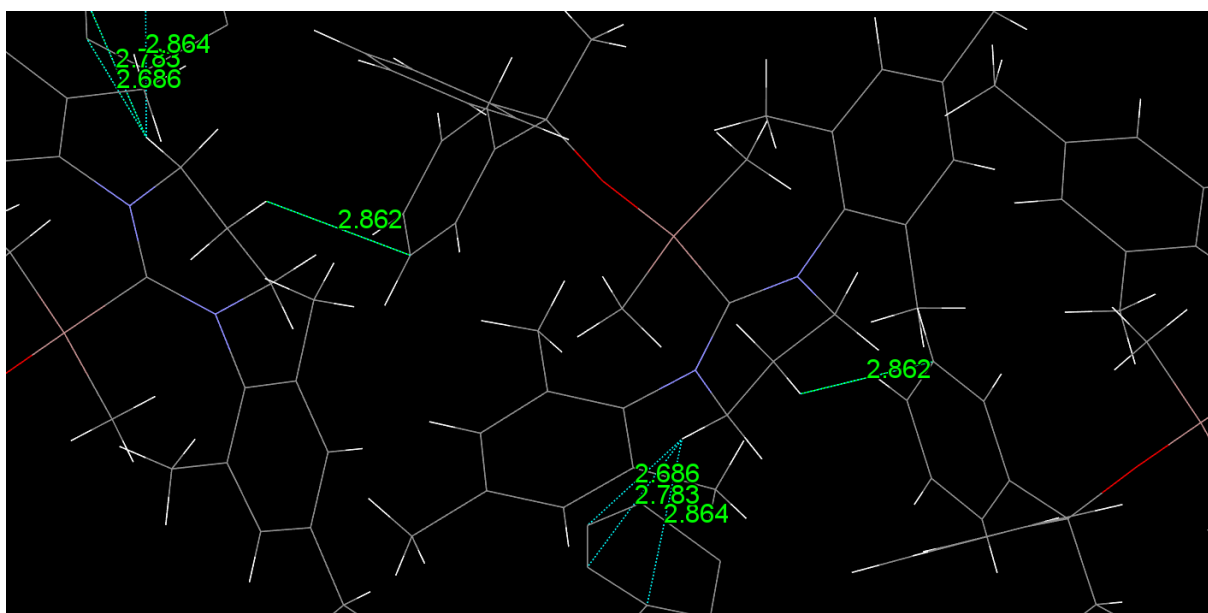

Figure S 58. Weak intermolecular interactions within the crystal structure of  $\text{Me}_2\text{Ga}(\text{OPh}_2\text{Me})(6\text{-Mes})$  (3).
